# Supplementary material for: Altered gene expression in antipsychotic-induced weight gain
Source: PubMed Central journal article supplement (PMC6458173; doi:10.1038/s41537-019-0075-y), 2019-04-10
Supplement: 41537_2019_75_MOESM1_ESM.pdf [file 41537_2019_75_MOESM1_ESM.pdf]

**Supplementary Table S1. Differential expression genes between the weight and the no weight gain groups before medication**

| geneID    | Gene Symbol   | Base Mean | Base Mean Weight Gain | Base Mean No Weight Gain | Fold Change | Log2 Fold Change | Pval     | Padj     | GeneRif Annotation |
|-----------|---------------|-----------|-----------------------|--------------------------|-------------|------------------|----------|----------|--------------------|
| 3047      | HBG1          | 733,23    | 184,32                | 1282,13                  | 6,96        | 2,80             | 6,25E-88 | 1,22E-83 | CHOLEST            |
| 9381      | OTOF          | 134,47    | 213,17                | 55,78                    | 0,26        | -1,93            | 7,64E-66 | 7,46E-62 |                    |
| 10964     | IFI44L        | 2693,83   | 3789,40               | 1598,25                  | 0,42        | -1,25            | 6,04E-32 | 3,93E-28 |                    |
| 6614      | SIGLEC1       | 1492,89   | 2042,72               | 943,07                   | 0,46        | -1,12            | 1,34E-29 | 6,56E-26 |                    |
| 91543     | RSAD2         | 1816,43   | 2611,27               | 1021,60                  | 0,39        | -1,35            | 7,31E-29 | 2,85E-25 |                    |
| 54094     | C21orf15      | 282,17    | 399,10                | 165,24                   | 0,41        | -1,27            | 2,09E-26 | 6,80E-23 |                    |
| 3048      | HBG2          | 2444,10   | 1364,10               | 3524,10                  | 2,58        | 1,37             | 5,53E-25 | 1,54E-21 | CHOLEST            |
| 10529     | NEBL          | 182,79    | 93,49                 | 272,09                   | 2,91        | 1,54             | 9,49E-25 | 2,32E-21 |                    |
| 10232     | MSLN          | 72,54     | 112,72                | 32,35                    | 0,29        | -1,80            | 5,84E-22 | 1,27E-18 | CHOLEST            |
| 6557      | SLC12A1       | 2998,20   | 1888,86               | 4107,54                  | 2,17        | 1,12             | 1,53E-20 | 2,98E-17 |                    |
| 3127      | HLA-DRB5      | 5034,64   | 3668,96               | 6400,31                  | 1,74        | 0,80             | 1,02E-18 | 1,82E-15 |                    |
| 57126     | CD177         | 247,35    | 311,20                | 183,51                   | 0,59        | -0,76            | 9,37E-18 | 1,52E-14 |                    |
| 93979     | CPA5          | 42,86     | 67,42                 | 18,31                    | 0,27        | -1,88            | 2,26E-17 | 3,40E-14 |                    |
| 101927586 | RP11-290F20.2 | 914,10    | 1177,29               | 650,90                   | 0,55        | -0,85            | 8,28E-17 | 1,15E-13 |                    |
| 389396    | GLYATL3       | 4,99      | 0,00                  | 9,97                     | #iDIV/0!    | #iDIV/0!         | 1,01E-15 | 1,32E-12 |                    |
| 10561     | IFI44         | 3833,70   | 4877,80               | 2789,61                  | 0,57        | -0,81            | 5,07E-15 | 6,13E-12 |                    |
| 23532     | PRAME         | 13,87     | 25,82                 | 1,92                     | 0,07        | -3,75            | 5,33E-15 | 6,13E-12 |                    |
| 3119      | HLA-DQB1      | 5801,02   | 4576,46               | 7025,57                  | 1,54        | 0,62             | 9,98E-15 | 1,08E-11 | CHOLEST            |
| 55384     | MEG3          | 79,95     | 46,75                 | 113,16                   | 2,42        | 1,28             | 2,15E-14 | 2,21E-11 |                    |
| 26807     | SNORD43       | 420,61    | 510,22                | 330,99                   | 0,65        | -0,62            | 2,31E-14 | 2,25E-11 |                    |
| 284751    | RP11-290F20.1 | 1943,24   | 2432,13               | 1454,36                  | 0,60        | -0,74            | 6,46E-14 | 6,00E-11 |                    |
| 284581    | LOC284581     | 171,63    | 218,55                | 124,71                   | 0,57        | -0,81            | 7,46E-14 | 6,62E-11 |                    |
| 56603     | CYP26B1       | 63,98     | 35,37                 | 92,58                    | 2,62        | 1,39             | 8,51E-14 | 7,23E-11 |                    |
| 64478     | CSMD1         | 53,51     | 72,19                 | 34,83                    | 0,48        | -1,05            | 1,10E-13 | 8,93E-11 |                    |
| 23026     | MYO16         | 486,89    | 690,49                | 283,29                   | 0,41        | -1,29            | 3,79E-13 | 2,96E-10 |                    |
| 554226    | ANKRD30BL     | 415,21    | 524,99                | 305,44                   | 0,58        | -0,78            | 4,00E-13 | 3,00E-10 |                    |
| 3488      | IGFBP5        | 11,02     | 3,21                  | 18,83                    | 5,86        | 2,55             | 4,20E-12 | 3,04E-09 |                    |
| 3434      | IFIT1         | 3027,77   | 3830,21               | 2225,33                  | 0,58        | -0,78            | 4,58E-12 | 3,20E-09 |                    |
| 91977     | MYOZ3         | 12,10     | 19,54                 | 4,65                     | 0,24        | -2,07            | 1,38E-11 | 9,32E-09 |                    |
| 5139      | PDE3A         | 1204,61   | 1473,36               | 935,87                   | 0,64        | -0,65            | 2,17E-11 | 1,41E-08 |                    |
| 100423062 | IGLL5         | 3580,81   | 2655,82               | 4505,81                  | 1,70        | 0,76             | 4,18E-11 | 2,63E-08 |                    |
| 26011     | TENM4         | 65,87     | 48,28                 | 83,47                    | 1,73        | 0,79             | 5,05E-11 | 3,08E-08 |                    |
| 1290      | COL5A2        | 42,41     | 56,95                 | 27,87                    | 0,49        | -1,03            | 6,67E-11 | 3,95E-08 |                    |
| 399697    | CTXN2         | 64,58     | 40,26                 | 88,89                    | 2,21        | 1,14             | 9,95E-11 | 5,71E-08 |                    |
| 342184    | FMN1          | 775,96    | 609,88                | 942,04                   | 1,54        | 0,63             | 1,60E-10 | 8,91E-08 |                    |
| 710       | SERPING1      | 781,93    | 979,17                | 584,68                   | 0,60        | -0,74            | 1,85E-10 | 1,01E-07 |                    |
| 131540    | ZDHC19        | 174,07    | 218,64                | 129,51                   | 0,59        | -0,76            | 2,63E-10 | 1,39E-07 |                    |
| 116835    | HSPA12B       | 24,42     | 13,21                 | 35,62                    | 2,70        | 1,43             | 3,35E-10 | 1,72E-07 |                    |
| 7225      | TRPC6         | 68,44     | 90,66                 | 46,22                    | 0,51        | -0,97            | 3,87E-10 | 1,94E-07 |                    |
| 1690      | COCH          | 267,16    | 201,85                | 332,46                   | 1,65        | 0,72             | 3,99E-10 | 1,95E-07 |                    |
| 129607    | CMPK2         | 1017,72   | 1261,31               | 774,14                   | 0,61        | -0,70            | 5,29E-10 | 2,52E-07 |                    |
| 3429      | IFI27         | 139,66    | 140,28                | 139,04                   | 0,99        | -0,01            | 1,11E-09 | 5,18E-07 |                    |
| 100506071 | RP11-829H16.3 | 213,21    | 160,66                | 265,76                   | 1,65        | 0,73             | 1,85E-09 | 8,39E-07 |                    |
| 3437      | IFIT3         | 6360,64   | 7830,66               | 4890,62                  | 0,62        | -0,68            | 2,55E-09 | 1,13E-06 |                    |
| 54097     | FAM3B         | 49,56     | 60,95                 | 38,17                    | 0,63        | -0,68            | 3,14E-09 | 1,36E-06 |                    |
| 10398     | MYL9          | 834,15    | 990,53                | 677,78                   | 0,68        | -0,55            | 5,02E-09 | 2,13E-06 |                    |
| 91181     | NUP210L       | 51,66     | 72,93                 | 30,39                    | 0,42        | -1,26            | 6,19E-09 | 2,52E-06 |                    |
| 283726    | FAM154B       | 102,44    | 59,07                 | 145,82                   | 2,47        | 1,30             | 6,20E-09 | 2,52E-06 |                    |
| 51673     | TPPP3         | 304,77    | 247,10                | 362,44                   | 1,47        | 0,55             | 7,15E-09 | 2,85E-06 |                    |
| 1832      | DSP           | 191,28    | 143,26                | 239,29                   | 1,67        | 0,74             | 9,91E-09 | 3,87E-06 |                    |
| 346171    | ZFP57         | 67,38     | 46,75                 | 88,01                    | 1,88        | 0,91             | 1,02E-08 | 3,91E-06 |                    |
| 266727    | MDGA1         | 564,69    | 621,92                | 507,46                   | 0,82        | -0,29            | 1,17E-08 | 4,38E-06 |                    |
| 165530    | CLEC4F        | 143,83    | 99,17                 | 188,48                   | 1,90        | 0,93             | 1,35E-08 | 4,99E-06 |                    |
| 728577    | CNTNAP3B      | 29,89     | 13,99                 | 45,80                    | 3,27        | 1,71             | 1,53E-08 | 5,52E-06 |                    |
| 608       | TNFRSF17      | 204,68    | 152,59                | 256,76                   | 1,68        | 0,75             | 1,62E-08 | 5,74E-06 |                    |
| 101059918 | GOLGA8R       | 54,00     | 71,85                 | 36,14                    | 0,50        | -0,99            | 1,92E-08 | 6,70E-06 |                    |
| 7849      | PAX8          | 1597,48   | 1319,63               | 1875,33                  | 1,42        | 0,51             | 2,50E-08 | 8,58E-06 |                    |

|                        |         |         |         |       |       |          |          |              |
|------------------------|---------|---------|---------|-------|-------|----------|----------|--------------|
| 338785 KRT79           | 12,19   | 2,96    | 21,42   | 7,24  | 2,86  | 2,60E-08 | 8,74E-06 |              |
| 654433 PAX8-AS1        | 1299,21 | 1074,52 | 1523,91 | 1,42  | 0,50  | 3,08E-08 | 1,02E-05 |              |
| 116071 BATF2           | 282,90  | 356,59  | 209,22  | 0,59  | -0,77 | 4,32E-08 | 1,41E-05 |              |
| 3486 IGFBP3            | 219,99  | 166,21  | 273,76  | 1,65  | 0,72  | 6,17E-08 | 1,97E-05 | BMI, CHOLEST |
| 94240 EPSTI1           | 2150,60 | 2570,83 | 1730,37 | 0,67  | -0,57 | 9,18E-08 | 2,89E-05 |              |
| 219970 GLYATL2         | 10,27   | 2,69    | 17,85   | 6,63  | 2,73  | 1,06E-07 | 3,28E-05 |              |
| 5266 PI3               | 1026,76 | 1259,64 | 793,89  | 0,63  | -0,67 | 1,11E-07 | 3,40E-05 |              |
| 266629 SEC14L3         | 61,33   | 78,37   | 44,29   | 0,57  | -0,82 | 1,87E-07 | 5,62E-05 |              |
| 4747 NEFL              | 201,83  | 160,58  | 243,08  | 1,51  | 0,60  | 1,91E-07 | 5,66E-05 |              |
| 5473 PPBP              | 3712,08 | 4424,74 | 2999,43 | 0,68  | -0,56 | 2,02E-07 | 5,88E-05 |              |
| 55966 AJAP1            | 208,82  | 236,02  | 181,62  | 0,77  | -0,38 | 2,84E-07 | 8,15E-05 |              |
| 29126 CD274            | 709,53  | 861,00  | 558,06  | 0,65  | -0,63 | 3,14E-07 | 8,88E-05 |              |
| 100272216 LOC100272216 | 544,37  | 663,58  | 425,16  | 0,64  | -0,64 | 3,22E-07 | 8,99E-05 |              |
| 1396 CRIP1             | 3572,88 | 2954,29 | 4191,47 | 1,42  | 0,50  | 3,34E-07 | 9,19E-05 |              |
| 3904 LAIR2             | 78,01   | 61,85   | 94,17   | 1,52  | 0,61  | 3,56E-07 | 9,65E-05 |              |
| 338773 TMEM119         | 70,46   | 91,69   | 49,22   | 0,54  | -0,90 | 4,04E-07 | 1,08E-04 |              |
| 6007 RHD               | 1045,15 | 1237,18 | 853,12  | 0,69  | -0,54 | 4,39E-07 | 1,16E-04 |              |
| 7130 TNFAIP6           | 910,64  | 1084,30 | 736,98  | 0,68  | -0,56 | 5,32E-07 | 1,39E-04 |              |
| 144195 SLC2A14         | 105,63  | 132,16  | 79,10   | 0,60  | -0,74 | 6,20E-07 | 1,59E-04 |              |
| 642846 LOC642846       | 307,36  | 361,81  | 252,91  | 0,70  | -0,52 | 8,09E-07 | 2,05E-04 |              |
| 9828 ARHGEF17          | 120,45  | 152,42  | 88,47   | 0,58  | -0,78 | 8,27E-07 | 2,07E-04 |              |
| 101927780 RP11-47122.2 | 143,24  | 169,17  | 117,32  | 0,69  | -0,53 | 1,06E-06 | 2,61E-04 |              |
| 118932 ANKRD22         | 242,76  | 295,17  | 190,34  | 0,64  | -0,63 | 1,13E-06 | 2,74E-04 |              |
| 114990 VASN            | 125,37  | 155,27  | 95,47   | 0,61  | -0,70 | 1,14E-06 | 2,74E-04 |              |
| 3911 LAMA5             | 282,62  | 230,02  | 335,22  | 1,46  | 0,54  | 1,15E-06 | 2,75E-04 |              |
| 114132 SIGLEC11        | 78,70   | 105,27  | 52,14   | 0,50  | -1,01 | 1,19E-06 | 2,81E-04 |              |
| 27181 SIGLEC8          | 434,03  | 461,02  | 407,05  | 0,88  | -0,18 | 1,26E-06 | 2,94E-04 |              |
| 55007 FAM118A          | 2253,89 | 2666,98 | 1840,81 | 0,69  | -0,53 | 1,31E-06 | 3,01E-04 |              |
| 5627 PROS1             | 102,16  | 127,72  | 76,60   | 0,60  | -0,74 | 1,34E-06 | 3,04E-04 |              |
| 3050 HBZ               | 39,57   | 26,33   | 52,81   | 2,01  | 1,00  | 1,61E-06 | 3,60E-04 |              |
| 1397 CRIP2             | 491,22  | 392,87  | 589,57  | 1,50  | 0,59  | 2,10E-06 | 4,65E-04 |              |
| 10410 IFITM3           | 8811,05 | 9903,60 | 7718,50 | 0,78  | -0,36 | 2,46E-06 | 5,39E-04 |              |
| 23495 TNFRSF13B        | 201,96  | 162,86  | 241,05  | 1,48  | 0,57  | 2,79E-06 | 6,04E-04 |              |
| 3690 ITGB3             | 2175,58 | 2618,18 | 1732,98 | 0,66  | -0,60 | 2,88E-06 | 6,17E-04 | CHOLEST      |
| 114884 OSBPL10         | 546,00  | 449,03  | 642,98  | 1,43  | 0,52  | 3,06E-06 | 6,47E-04 | CHOLEST      |
| 25849 PARM1            | 221,41  | 177,37  | 265,44  | 1,50  | 0,58  | 3,11E-06 | 6,47E-04 |              |
| 64105 CENPK            | 814,50  | 938,98  | 690,01  | 0,73  | -0,44 | 3,10E-06 | 6,47E-04 |              |
| 9945 GFPT2             | 33,74   | 22,57   | 44,92   | 1,99  | 0,99  | 3,29E-06 | 6,76E-04 |              |
| 3512 IGJ               | 5769,70 | 4746,53 | 6792,88 | 1,43  | 0,52  | 3,38E-06 | 6,88E-04 |              |
| 81567 TXNDC5           | 6644,15 | 5474,20 | 7814,10 | 1,43  | 0,51  | 4,11E-06 | 8,27E-04 |              |
| 440387 CTRB2           | 14,78   | 17,55   | 12,01   | 0,68  | -0,55 | 4,72E-06 | 9,40E-04 |              |
| 100506159 LOC100506159 | 141,00  | 166,70  | 115,30  | 0,69  | -0,53 | 4,80E-06 | 9,46E-04 |              |
| 219736 STOX1           | 38,31   | 51,32   | 25,30   | 0,49  | -1,02 | 4,88E-06 | 9,53E-04 |              |
| 838 CASP5              | 635,12  | 738,38  | 531,85  | 0,72  | -0,47 | 5,46E-06 | 1,06E-03 |              |
| 1824 DSC2              | 1676,05 | 1975,30 | 1376,81 | 0,70  | -0,52 | 5,81E-06 | 1,11E-03 |              |
| 283358 B4GALNT3        | 225,17  | 183,62  | 266,73  | 1,45  | 0,54  | 6,16E-06 | 1,17E-03 |              |
| 654341 TBC1D3G         | 3,27    | 0,22    | 6,31    | 28,39 | 4,83  | 6,40E-06 | 1,20E-03 |              |
| 54739 XAF1             | 6462,84 | 7370,73 | 5554,96 | 0,75  | -0,41 | 6,64E-06 | 1,23E-03 |              |
| 4061 LY6E              | 5351,50 | 6055,24 | 4647,76 | 0,77  | -0,38 | 6,98E-06 | 1,29E-03 |              |
| 1286 COL4A4            | 201,37  | 162,32  | 240,42  | 1,48  | 0,57  | 7,54E-06 | 1,38E-03 |              |
| 66000 TMEM108          | 138,32  | 171,77  | 104,87  | 0,61  | -0,71 | 8,35E-06 | 1,51E-03 |              |
| 2487 FRZB              | 3,42    | 0,59    | 6,26    | 10,62 | 3,41  | 8,57E-06 | 1,53E-03 |              |
| 64284 RAB17            | 8,32    | 3,11    | 13,53   | 4,35  | 2,12  | 1,09E-05 | 1,94E-03 |              |
| 360226 PRSS41          | 93,49   | 103,71  | 83,27   | 0,80  | -0,32 | 1,26E-05 | 2,21E-03 |              |
| 79365 BHLHE41          | 157,11  | 126,13  | 188,08  | 1,49  | 0,58  | 1,33E-05 | 2,30E-03 |              |
| 23428 SLC7A8           | 188,98  | 225,33  | 152,63  | 0,68  | -0,56 | 1,33E-05 | 2,30E-03 |              |
| 2258 FGF13             | 82,65   | 101,12  | 64,19   | 0,63  | -0,66 | 1,37E-05 | 2,35E-03 |              |
| 10501 SEMA6B           | 95,69   | 113,95  | 77,42   | 0,68  | -0,56 | 1,40E-05 | 2,37E-03 |              |
| 140 ADORA3             | 495,95  | 555,36  | 436,55  | 0,79  | -0,35 | 1,43E-05 | 2,40E-03 |              |
| 8082 SSPN              | 204,12  | 168,22  | 240,01  | 1,43  | 0,51  | 1,67E-05 | 2,78E-03 |              |
| 3816 KLK1              | 36,96   | 27,43   | 46,48   | 1,69  | 0,76  | 1,68E-05 | 2,78E-03 |              |
| 3620 IDO1              | 288,37  | 324,00  | 252,74  | 0,78  | -0,36 | 1,81E-05 | 2,97E-03 | BMI          |
| 10178 TENM1            | 772,78  | 887,77  | 657,79  | 0,74  | -0,43 | 1,89E-05 | 3,07E-03 |              |

|           |                |          |         |          |       |       |          |          |         |
|-----------|----------------|----------|---------|----------|-------|-------|----------|----------|---------|
| 116369    | SLC26A8        | 907,17   | 1062,32 | 752,01   | 0,71  | -0,50 | 1,93E-05 | 3,11E-03 |         |
| 440068    | CARD17         | 181,48   | 212,22  | 150,73   | 0,71  | -0,49 | 2,05E-05 | 3,28E-03 |         |
| 200958    | MUC20          | 167,82   | 186,57  | 149,06   | 0,80  | -0,32 | 2,11E-05 | 3,34E-03 |         |
| 84680     | ACCS           | 1326,71  | 1479,76 | 1173,65  | 0,79  | -0,33 | 2,37E-05 | 3,73E-03 |         |
| 30848     | CTAG2          | 2,29     | 0,33    | 4,25     | 12,72 | 3,67  | 2,68E-05 | 4,18E-03 |         |
| 4940      | OAS3           | 5566,88  | 6467,27 | 4666,49  | 0,72  | -0,47 | 2,79E-05 | 4,33E-03 |         |
| 222389    | BEND7          | 139,56   | 172,23  | 106,89   | 0,62  | -0,69 | 2,83E-05 | 4,35E-03 |         |
| 57699     | CPNE5          | 1123,07  | 942,26  | 1303,87  | 1,38  | 0,47  | 2,92E-05 | 4,46E-03 |         |
| 2791      | GNG11          | 997,89   | 1148,51 | 847,26   | 0,74  | -0,44 | 3,17E-05 | 4,79E-03 |         |
| 5891      | MOK            | 77,97    | 64,48   | 91,47    | 1,42  | 0,50  | 3,81E-05 | 5,72E-03 |         |
| 3934      | LCN2           | 807,57   | 625,96  | 989,19   | 1,58  | 0,66  | 3,84E-05 | 5,73E-03 | BMI     |
| 2209      | FCGR1A         | 857,96   | 996,45  | 719,48   | 0,72  | -0,47 | 3,88E-05 | 5,74E-03 |         |
| 23639     | LRRC6          | 884,40   | 816,99  | 951,80   | 1,17  | 0,22  | 3,97E-05 | 5,82E-03 |         |
| 10562     | OLFM4          | 306,85   | 240,59  | 373,11   | 1,55  | 0,63  | 4,12E-05 | 6,00E-03 |         |
| 145645    | C15orf43       | 53,37    | 64,01   | 42,72    | 0,67  | -0,58 | 4,18E-05 | 6,05E-03 |         |
| 3674      | ITGA2B         | 2241,36  | 2582,62 | 1900,10  | 0,74  | -0,44 | 4,22E-05 | 6,06E-03 |         |
| 9242      | MSC            | 137,17   | 112,76  | 161,57   | 1,43  | 0,52  | 4,40E-05 | 6,26E-03 |         |
| 10215     | OLIG2          | 138,63   | 149,26  | 128,00   | 0,86  | -0,22 | 4,48E-05 | 6,33E-03 |         |
| 973       | CD79A          | 3978,03  | 3399,70 | 4556,35  | 1,34  | 0,42  | 4,63E-05 | 6,51E-03 |         |
| 714       | C1QC           | 38,73    | 45,18   | 32,28    | 0,71  | -0,49 | 4,80E-05 | 6,64E-03 |         |
| 2838      | GPR15          | 577,94   | 543,24  | 612,63   | 1,13  | 0,17  | 4,77E-05 | 6,64E-03 |         |
| 3123      | HLA-DRB1       | 10360,94 | 9235,92 | 11485,96 | 1,24  | 0,31  | 4,97E-05 | 6,83E-03 | CHOLEST |
| 9891      | NUAK1          | 38,56    | 26,26   | 50,86    | 1,94  | 0,95  | 5,06E-05 | 6,91E-03 |         |
| 3092      | HIP1           | 4048,84  | 4490,19 | 3607,49  | 0,80  | -0,32 | 5,14E-05 | 6,97E-03 |         |
| 2537      | IFI6           | 2101,11  | 2393,51 | 1808,70  | 0,76  | -0,40 | 5,63E-05 | 7,56E-03 |         |
| 100526836 | BLOC1S5-TXNDC5 | 7661,76  | 6488,70 | 8834,83  | 1,36  | 0,45  | 5,65E-05 | 7,56E-03 |         |
| 84623     | KIRREL3        | 207,59   | 234,16  | 181,03   | 0,77  | -0,37 | 5,75E-05 | 7,64E-03 |         |
| 168620    | BHLHA15        | 19,90    | 13,42   | 26,38    | 1,97  | 0,98  | 5,81E-05 | 7,66E-03 |         |
| 105       | ADARB2         | 957,15   | 1047,66 | 866,63   | 0,83  | -0,27 | 6,02E-05 | 7,88E-03 |         |
| 728262    | FAM157A        | 745,88   | 849,11  | 642,64   | 0,76  | -0,40 | 6,05E-05 | 7,88E-03 |         |
| 10395     | DLC1           | 39,26    | 26,41   | 52,11    | 1,97  | 0,98  | 6,12E-05 | 7,92E-03 |         |
| 11346     | SYNPO          | 344,11   | 292,50  | 395,72   | 1,35  | 0,44  | 6,21E-05 | 7,97E-03 |         |
| 4605      | MYBL2          | 221,22   | 175,33  | 267,11   | 1,52  | 0,61  | 6,26E-05 | 7,99E-03 |         |
| 3938      | LCT            | 25,89    | 31,86   | 19,93    | 0,63  | -0,68 | 7,15E-05 | 9,06E-03 | BMI     |
| 51237     | MZB1           | 814,75   | 676,88  | 952,61   | 1,41  | 0,49  | 7,46E-05 | 9,40E-03 |         |

#### Headers of the Table

|                          |                                                                                                                  |
|--------------------------|------------------------------------------------------------------------------------------------------------------|
| geneID                   | Gene Identification                                                                                              |
| Gene Symbol              | Official Symbol                                                                                                  |
| Base Mean                | Mean normalized counts, averaged over all samples from both conditions                                           |
| Base Mean Weight Gain    | Mean normalized counts from condition A                                                                          |
| Base Mean No Weight Gain | Mean normalized counts from condition B                                                                          |
| Fold Change              | Fold change from condition A to B (B/A)                                                                          |
| Log2 Fold Change         | The logarithm, to basis 2, of the fold change                                                                    |
| Pval                     | P value for the statistical significance of this change                                                          |
| Padj                     | P value adjusted for multiple testing with the Benjamini-Hochberg procedure, which controls false discovery rate |
| GeneRif Annotation       | Genes including the strings "BMI" or "cholest" in their GeneRIF definition                                       |

#### Supplementary Table S2. Differential expression genes before and after 3 months of antipsychotic medication in the weight gain group

| geneID    | Gene Symbol  | Base Mean | Base Mean Before Medication | Base Mean After Medication | Fold Change | Log2 Fold Change | Pval      | Padj      | GeneRif Annotation |
|-----------|--------------|-----------|-----------------------------|----------------------------|-------------|------------------|-----------|-----------|--------------------|
| 100462981 | MTRNR2L2     | 259.65    | 24.81                       | 494.49                     | 19.93       | 4.32             | 1.68E-139 | 3.27E-135 |                    |
| 3429      | IFI27        | 75.87     | 127.06                      | 24.68                      | 0.19        | -2.36            | 1.61E-55  | 1.56E-51  |                    |
| 9381      | OTOF         | 126.75    | 193.19                      | 60.32                      | 0.31        | -1.68            | 3.62E-49  | 2.34E-45  |                    |
| 100190986 | LOC100190986 | 49.18     | 8.81                        | 89.54                      | 10.17       | 3.35             | 1.74E-41  | 8.45E-38  |                    |
| 10562     | OLFM4        | 411.37    | 217.58                      | 605.17                     | 2.78        | 1.48             | 1.94E-37  | 7.53E-34  |                    |
| 9509      | ADAMTS2      | 43.10     | 72.83                       | 13.38                      | 0.18        | -2.44            | 1.14E-36  | 3.68E-33  |                    |
| 4057      | LTF          | 3526.72   | 2039.45                     | 5013.98                    | 2.46        | 1.30             | 5.59E-35  | 1.55E-31  |                    |
| 3934      | LCN2         | 974.95    | 566.25                      | 1383.66                    | 2.44        | 1.29             | 4.24E-34  | 1.03E-30  | BMI                |
| 4317      | MMP8         | 496.57    | 297.24                      | 695.90                     | 2.34        | 1.23             | 3.15E-30  | 6.80E-27  | CHOLEST            |
| 154664    | ABCA13       | 277.61    | 155.82                      | 399.40                     | 2.56        | 1.36             | 5.00E-30  | 9.71E-27  |                    |
| 1088      | CEACAM8      | 556.83    | 321.14                      | 792.53                     | 2.47        | 1.30             | 1.96E-29  | 3.47E-26  |                    |
| 10321     | CRISP3       | 265.27    | 163.34                      | 367.21                     | 2.25        | 1.17             | 7.19E-24  | 1.16E-20  |                    |
| 4973      | OLR1         | 84.71     | 46.21                       | 123.20                     | 2.67        | 1.41             | 5.58E-22  | 8.34E-19  | CHOLEST            |
| 1667      | DEFA1        | 2098.89   | 1385.07                     | 2812.72                    | 2.03        | 1.02             | 5.33E-21  | 6.47E-18  | CHOLEST            |
| 728358    | DEFA1B       | 2098.89   | 1385.07                     | 2812.72                    | 2.03        | 1.02             | 5.33E-21  | 6.47E-18  |                    |
| 1668      | DEFA3        | 2098.89   | 1385.07                     | 2812.72                    | 2.03        | 1.02             | 5.33E-21  | 6.47E-18  | CHOLEST            |
| 4680      | CEACAM6      | 422.66    | 267.73                      | 577.58                     | 2.16        | 1.11             | 2.54E-20  | 2.90E-17  |                    |
| 23500     | DAAM2        | 428.62    | 586.27                      | 270.96                     | 0.46        | -1.11            | 6.56E-20  | 7.08E-17  |                    |
| 1669      | DEFA4        | 443.69    | 285.76                      | 601.61                     | 2.11        | 1.07             | 3.12E-19  | 3.19E-16  |                    |
| 6614      | SIGLEC1      | 1438.49   | 1849.10                     | 1027.87                    | 0.56        | -0.85            | 2.13E-17  | 2.07E-14  |                    |
| 671       | BPI          | 983.89    | 689.83                      | 1277.95                    | 1.85        | 0.89             | 1.85E-15  | 1.71E-12  |                    |
| 10964     | IFI44L       | 2680.65   | 3429.55                     | 1931.74                    | 0.56        | -0.83            | 3.25E-15  | 2.87E-12  |                    |
| 6948      | TCN2         | 326.53    | 415.37                      | 237.69                     | 0.57        | -0.81            | 7.00E-13  | 5.92E-10  |                    |
| 4353      | MPO          | 930.24    | 667.37                      | 1193.10                    | 1.79        | 0.84             | 8.63E-13  | 6.99E-10  | BMI, CHOLEST       |
| 246       | ALOX15       | 1331.00   | 966.12                      | 1695.88                    | 1.76        | 0.81             | 7.69E-12  | 5.98E-09  | CHOLEST            |
| 5139      | PDE3A        | 1099.33   | 1333.58                     | 865.08                     | 0.65        | -0.62            | 1.95E-11  | 1.46E-08  |                    |
| 1511      | CTSG         | 144.84    | 99.64                       | 190.05                     | 1.91        | 0.93             | 2.43E-11  | 1.75E-08  |                    |
| 932       | MS4A3        | 558.95    | 424.58                      | 693.33                     | 1.63        | 0.71             | 2.38E-10  | 1.65E-07  |                    |
| 5657      | PRTN3        | 82.14     | 53.77                       | 110.51                     | 2.06        | 1.04             | 2.69E-10  | 1.81E-07  |                    |
| 260429    | PRSS33       | 716.35    | 538.32                      | 894.38                     | 1.66        | 0.73             | 4.73E-10  | 3.07E-07  |                    |
| 26807     | SNORD43      | 440.45    | 462.31                      | 418.59                     | 0.91        | -0.14            | 5.80E-10  | 3.64E-07  |                    |
| 27181     | SIGLEC8      | 551.89    | 417.11                      | 686.67                     | 1.65        | 0.72             | 9.22E-10  | 5.60E-07  |                    |
| 554226    | ANKRD30BL    | 392.51    | 475.10                      | 309.92                     | 0.65        | -0.62            | 2.14E-09  | 1.26E-06  |                    |
| 713       | C1QB         | 73.59     | 92.98                       | 54.20                      | 0.58        | -0.78            | 3.22E-09  | 1.84E-06  |                    |
| 2078      | ERG          | 76.32     | 52.20                       | 100.44                     | 1.92        | 0.94             | 4.98E-09  | 2.77E-06  | BMI, CHOLEST       |
| 820       | CAMP         | 658.36    | 519.29                      | 797.44                     | 1.54        | 0.62             | 5.59E-09  | 3.02E-06  |                    |
| 5819      | PVRL2        | 348.80    | 395.56                      | 302.04                     | 0.76        | -0.39            | 7.54E-09  | 3.96E-06  | CHOLEST            |
| 1991      | ELANE        | 257.88    | 188.35                      | 327.40                     | 1.74        | 0.80             | 9.32E-09  | 4.77E-06  |                    |
| 10410     | IFITM3       | 7407.41   | 8964.88                     | 5849.94                    | 0.65        | -0.62            | 1.22E-08  | 6.08E-06  |                    |
| 387755    | INSC         | 93.23     | 120.81                      | 65.65                      | 0.54        | -0.88            | 2.01E-08  | 9.53E-06  |                    |
| 212       | ALAS2        | 5696.89   | 7086.14                     | 4307.64                    | 0.61        | -0.72            | 1.98E-08  | 9.53E-06  |                    |
| 1308      | COL17A1      | 57.85     | 39.87                       | 75.82                      | 1.90        | 0.93             | 4.84E-08  | 2.24E-05  |                    |
| 55301     | OLAH         | 27.90     | 39.08                       | 16.71                      | 0.43        | -1.23            | 5.38E-08  | 2.43E-05  |                    |
| 19        | ABCA1        | 3549.63   | 4191.95                     | 2907.32                    | 0.69        | -0.53            | 6.32E-08  | 2.79E-05  | BMI, CHOLEST       |
| 3620      | IDO1         | 372.40    | 293.14                      | 451.67                     | 1.54        | 0.62             | 6.55E-08  | 2.83E-05  | BMI                |
| 566       | AZU1         | 323.03    | 244.01                      | 402.06                     | 1.65        | 0.72             | 7.99E-08  | 3.33E-05  |                    |
| 91543     | RSAD2        | 1904.06   | 2362.04                     | 1446.08                    | 0.61        | -0.71            | 8.06E-08  | 3.33E-05  |                    |
| 9672      | SDC3         | 236.36    | 288.74                      | 183.99                     | 0.64        | -0.65            | 9.66E-08  | 3.91E-05  |                    |
| 94031     | HTRA3        | 22.87     | 14.14                       | 31.60                      | 2.23        | 1.16             | 2.52E-07  | 0.00010   |                    |
| 6947      | TCN1         | 273.00    | 218.68                      | 327.32                     | 1.50        | 0.58             | 4.95E-07  | 0.00019   | CHOLEST            |
| 2030      | SLC29A1      | 1128.86   | 910.51                      | 1347.21                    | 1.48        | 0.57             | 5.27E-07  | 0.00020   |                    |
| 4481      | MSR1         | 241.92    | 288.65                      | 195.18                     | 0.68        | -0.56            | 5.22E-07  | 0.00020   |                    |
| 283120    | H19          | 27.11     | 17.35                       | 36.87                      | 2.13        | 1.09             | 5.37E-07  | 0.00020   | BMI, CHOLEST       |
| 100133941 | CD24         | 1378.05   | 1132.02                     | 1624.08                    | 1.43        | 0.52             | 6.03E-07  | 0.00022   |                    |
| 7130      | TNFAIP6      | 829.02    | 981.59                      | 676.45                     | 0.69        | -0.54            | 6.76E-07  | 0.00024   |                    |
| 2359      | FPR3         | 216.02    | 263.34                      | 168.70                     | 0.64        | -0.64            | 7.45E-07  | 0.00026   |                    |
| 83869     | TTY14        | 1402.58   | 1154.14                     | 1651.01                    | 1.43        | 0.52             | 7.67E-07  | 0.00026   |                    |
| 714       | C1QC         | 32.25     | 40.90                       | 23.61                      | 0.58        | -0.79            | 7.97E-07  | 0.00027   |                    |

|                         |           |           |           |      |       |          |         |         |
|-------------------------|-----------|-----------|-----------|------|-------|----------|---------|---------|
| 6037 RNASE3             | 226.54    | 172.08    | 281.01    | 1.63 | 0.71  | 9.91E-07 | 0.00033 | BMI     |
| 2168 FABP1              | 1.87      | 3.64      | 0.10      | 0.03 | -5.22 | 1.17E-06 | 0.00037 | CHOLEST |
| 5166 PDK4               | 1536.58   | 1800.70   | 1272.45   | 0.71 | -0.50 | 1.16E-06 | 0.00037 |         |
| 712 C1QA                | 132.57    | 156.71    | 108.43    | 0.69 | -0.53 | 1.25E-06 | 0.00039 |         |
| 26577 PCOLCE2           | 12.66     | 6.48      | 18.83     | 2.90 | 1.54  | 1.27E-06 | 0.00039 | CHOLEST |
| 10215 OLIG2             | 173.74    | 135.04    | 212.44    | 1.57 | 0.65  | 1.40E-06 | 0.00042 |         |
| 1053 CEBPE              | 340.64    | 272.41    | 408.87    | 1.50 | 0.59  | 1.92E-06 | 0.00057 |         |
| 762 CA4                 | 626.78    | 737.77    | 515.80    | 0.70 | -0.52 | 1.99E-06 | 0.00059 |         |
| 79056 PRRG4             | 1358.84   | 1591.43   | 1126.26   | 0.71 | -0.50 | 2.12E-06 | 0.00062 |         |
| 23026 MYO16             | 506.08    | 625.44    | 386.71    | 0.62 | -0.69 | 2.19E-06 | 0.00063 |         |
| 54682 MANSC1            | 1778.93   | 2062.89   | 1494.98   | 0.72 | -0.46 | 2.51E-06 | 0.00071 |         |
| 1178 CLC                | 4661.99   | 3848.79   | 5475.19   | 1.42 | 0.51  | 3.16E-06 | 0.00088 |         |
| 11026 LILRA3            | 1935.75   | 2239.16   | 1632.35   | 0.73 | -0.46 | 3.42E-06 | 0.00094 |         |
| 6035 RNASE1             | 30.88     | 41.11     | 20.65     | 0.50 | -0.99 | 4.06E-06 | 0.00110 |         |
| 4583 MUC2               | 1.74      | 3.39      | 0.09      | 0.03 | -5.24 | 4.58E-06 | 0.00121 |         |
| 133 ADM                 | 1189.76   | 1385.46   | 994.05    | 0.72 | -0.48 | 4.66E-06 | 0.00121 | BMI     |
| 144195 SLC2A14          | 99.52     | 119.71    | 79.33     | 0.66 | -0.59 | 4.62E-06 | 0.00121 |         |
| 10720 UGT2B11           | 642.39    | 526.64    | 758.14    | 1.44 | 0.53  | 4.82E-06 | 0.00123 |         |
| 57126 CD177             | 241.33    | 281.67    | 200.99    | 0.71 | -0.49 | 5.17E-06 | 0.00127 |         |
| 101927586 RP11-290F20.2 | 942.66    | 1065.73   | 819.60    | 0.77 | -0.38 | 5.10E-06 | 0.00127 |         |
| 8460 TPST1              | 631.02    | 749.84    | 512.19    | 0.68 | -0.55 | 5.14E-06 | 0.00127 |         |
| 22895 RPH3A             | 481.41    | 534.53    | 428.29    | 0.80 | -0.32 | 5.75E-06 | 0.00140 |         |
| 1179 CLCA1              | 1.66      | 3.21      | 0.12      | 0.04 | -4.78 | 7.77E-06 | 0.00187 |         |
| 199675 C19orf59         | 829.20    | 957.20    | 701.19    | 0.73 | -0.45 | 8.32E-06 | 0.00197 |         |
| 6768 ST14               | 1102.79   | 1263.81   | 941.76    | 0.75 | -0.42 | 8.63E-06 | 0.00200 |         |
| 94 ACVRL1               | 65.20     | 80.52     | 49.88     | 0.62 | -0.69 | 8.65E-06 | 0.00200 |         |
| 1719 DHFR               | 913.24    | 674.56    | 1151.92   | 1.71 | 0.77  | 9.46E-06 | 0.00216 |         |
| 10461 MERTK             | 307.03    | 359.17    | 254.89    | 0.71 | -0.49 | 1.04E-05 | 0.00234 |         |
| 2322 FLT3               | 574.20    | 664.73    | 483.67    | 0.73 | -0.46 | 1.34E-05 | 0.00299 |         |
| 653061 GOLGA8S          | 64.35     | 42.69     | 86.01     | 2.01 | 1.01  | 1.42E-05 | 0.00313 |         |
| 79937 CNTNAP3           | 1609.66   | 1868.71   | 1350.60   | 0.72 | -0.47 | 1.43E-05 | 0.00313 |         |
| 4061 LY6E               | 4802.64   | 5480.03   | 4125.25   | 0.75 | -0.41 | 1.62E-05 | 0.00349 |         |
| 83999 KREMEN1           | 1996.29   | 2310.36   | 1682.21   | 0.73 | -0.46 | 1.85E-05 | 0.00396 |         |
| 722 C4BPA               | 101.42    | 80.22     | 122.62    | 1.53 | 0.61  | 2.00E-05 | 0.00423 |         |
| 440068 CARD17           | 164.15    | 192.13    | 136.17    | 0.71 | -0.50 | 2.10E-05 | 0.00440 |         |
| 717 C2                  | 261.31    | 306.48    | 216.14    | 0.71 | -0.50 | 2.14E-05 | 0.00442 |         |
| 8942 KYNU               | 828.94    | 964.88    | 693.01    | 0.72 | -0.48 | 2.20E-05 | 0.00451 |         |
| 9447 AIM2               | 830.82    | 961.13    | 700.51    | 0.73 | -0.46 | 2.29E-05 | 0.00461 |         |
| 5730 PTGDS              | 759.11    | 837.56    | 680.67    | 0.81 | -0.30 | 2.30E-05 | 0.00461 |         |
| 731424 RP11-701P16.5    | 351.48    | 401.08    | 301.88    | 0.75 | -0.41 | 2.65E-05 | 0.00526 |         |
| 2687 GGT5               | 71.69     | 55.76     | 87.62     | 1.57 | 0.65  | 2.93E-05 | 0.00570 |         |
| 10917 BTNL3             | 483.21    | 548.85    | 417.58    | 0.76 | -0.39 | 2.93E-05 | 0.00570 |         |
| 100463486 MTRNR2L8      | 115.27    | 82.31     | 148.23    | 1.80 | 0.85  | 2.99E-05 | 0.00576 |         |
| 765 CA6                 | 823.20    | 717.39    | 929.00    | 1.29 | 0.37  | 3.19E-05 | 0.00608 |         |
| 353514 LILRA5           | 3611.27   | 4161.00   | 3061.54   | 0.74 | -0.44 | 3.26E-05 | 0.00615 |         |
| 10501 SEMA6B            | 87.20     | 103.14    | 71.25     | 0.69 | -0.53 | 3.71E-05 | 0.00693 |         |
| 6280 S100A9             | 133237.54 | 151778.95 | 114696.12 | 0.76 | -0.40 | 3.79E-05 | 0.00701 |         |
| 51338 MS4A4A            | 220.38    | 260.41    | 180.35    | 0.69 | -0.53 | 4.21E-05 | 0.00772 |         |
| 284751 RP11-290F20.1    | 1978.17   | 2201.62   | 1754.72   | 0.80 | -0.33 | 4.36E-05 | 0.00793 |         |
| 10561 IFI44             | 3836.21   | 4414.41   | 3258.02   | 0.74 | -0.44 | 4.53E-05 | 0.00816 |         |
| 1118 CHIT1              | 130.26    | 104.29    | 156.23    | 1.50 | 0.58  | 4.78E-05 | 0.00847 |         |
| 10184 LHFPL2            | 903.15    | 1045.05   | 761.25    | 0.73 | -0.46 | 4.81E-05 | 0.00847 |         |
| 100874264 AOAH-IT1      | 31.86     | 42.10     | 21.61     | 0.51 | -0.96 | 4.88E-05 | 0.00847 |         |
| 8972 MGAM               | 14037.22  | 15917.41  | 12157.04  | 0.76 | -0.39 | 4.85E-05 | 0.00847 |         |
| 11326 VSIG4             | 160.92    | 190.45    | 131.38    | 0.69 | -0.54 | 5.12E-05 | 0.00880 |         |
| 55512 SMPD3             | 1959.32   | 1660.44   | 2258.20   | 1.36 | 0.44  | 5.18E-05 | 0.00883 |         |
| 11251 PTGDR2            | 1025.69   | 876.52    | 1174.85   | 1.34 | 0.42  | 5.77E-05 | 0.00976 |         |

#### Headers of the Table

geneID      Gene Identification

Gene          Official Symbol

Symbol

Base Mean    Mean normalized counts, averaged over all samples from both conditions

Base Mean Before Medication Mean normalized counts from condition A

Base Mean After Medication Mean normalized counts from condition B

Fold Change Fold change from condition A to B (B/A)

Log2 Fold Change The logarithm, to basis 2, of the fold change

Pval P value for the statistical significance of this change

Padj P value adjusted for multiple testing with the Benjamini-Hochberg procedure, which controls false discovery rate

GeneRif Annotation Genes including the strings "BMI" or "cholest" in their GeneRIF definition

**Supplementary Table S3. Differential expression genes before and after 3 months of antipsychotic medication in the no weight gain group**

| geneID    | Gene Symbol  | Base Mean | Base Mean Before Medication<br>n | Base Mean After Medication<br>n | Fold Change | Log2 Fold Change | Pval      | Padj      | GeneRif Annotation |
|-----------|--------------|-----------|----------------------------------|---------------------------------|-------------|------------------|-----------|-----------|--------------------|
| 100462981 | MTRNR2L2     | 26,80     | 1108,97                          | 41,38                           | 41,38       | 5,37             | 2,34E-226 | 4,57E-222 |                    |
| 100190986 | LOC100190986 | 9,60      | 112,72                           | 11,74                           | 11,74       | 3,55             | 3,12E-52  | 3,05E-48  |                    |
| 3620      | IDO1         | 248,04    | 592,70                           | 2,39                            | 2,39        | 1,26             | 1,19E-39  | 7,77E-36  | BMI                |
| 118932    | ANKRD22      | 186,84    | 437,44                           | 2,34                            | 2,34        | 1,23             | 1,62E-31  | 7,92E-28  |                    |
| 9509      | ADAMTS2      | 84,65     | 20,24                            | 0,24                            | 0,24        | -2,06            | 6,95E-31  | 2,71E-27  |                    |
| 3627      | CXCL10       | 82,27     | 208,90                           | 2,54                            | 2,54        | 1,34             | 7,59E-30  | 2,47E-26  |                    |
| 419       | ART3         | 90,41     | 223,32                           | 2,47                            | 2,47        | 1,30             | 2,01E-29  | 5,61E-26  |                    |
| 1719      | DHFR         | 704,83    | 1808,97                          | 2,57                            | 2,57        | 1,36             | 1,87E-25  | 4,56E-22  |                    |
| 115362    | GBP5         | 10500,80  | 19955,17                         | 1,90                            | 1,90        | 0,93             | 1,19E-24  | 2,58E-21  |                    |
| 710       | SERPING1     | 573,69    | 1107,86                          | 1,93                            | 1,93        | 0,95             | 2,83E-24  | 5,52E-21  |                    |
| 116071    | BATF2        | 205,30    | 426,03                           | 2,08                            | 2,08        | 1,05             | 5,56E-23  | 9,88E-20  |                    |
| 51513     | ETV7         | 186,93    | 412,00                           | 2,20                            | 2,20        | 1,14             | 6,72E-23  | 1,09E-19  |                    |
| 100463486 | MTRNR2L8     | 86,68     | 251,67                           | 2,90                            | 2,90        | 1,54             | 5,13E-22  | 7,70E-19  |                    |
| 91543     | RSAD2        | 1002,32   | 1776,90                          | 1,77                            | 1,77        | 0,83             | 2,89E-21  | 4,03E-18  |                    |
| 246       | ALOX15       | 1283,03   | 1848,49                          | 1,44                            | 1,44        | 0,53             | 8,26E-17  | 1,08E-13  | CHOLEST            |
| 80832     | APOL4        | 60,12     | 129,39                           | 2,15                            | 2,15        | 1,11             | 9,73E-17  | 1,19E-13  |                    |
| 100423062 | IGLL5        | 4421,30   | 2416,72                          | 0,55                            | 0,55        | -0,87            | 1,04E-16  | 1,19E-13  |                    |
| 10501     | SEMA6B       | 76,07     | 167,70                           | 2,20                            | 2,20        | 1,14             | 3,40E-16  | 3,69E-13  |                    |
| 27181     | SIGLEC8      | 399,48    | 601,42                           | 1,51                            | 1,51        | 0,59             | 3,74E-16  | 3,84E-13  |                    |
| 9934      | P2RY14       | 649,86    | 1051,01                          | 1,62                            | 1,62        | 0,69             | 4,42E-16  | 4,31E-13  |                    |
| 23500     | DAAM2        | 569,82    | 393,31                           | 0,69                            | 0,69        | -0,53            | 1,77E-15  | 1,65E-12  |                    |
| 1278      | COL1A2       | 4,52      | 20,33                            | 4,49                            | 4,49        | 2,17             | 3,70E-15  | 3,28E-12  |                    |
| 2633      | GBP1         | 4104,47   | 6675,87                          | 1,63                            | 1,63        | 0,70             | 7,00E-15  | 5,94E-12  |                    |
| 27074     | LAMP3        | 133,19    | 237,12                           | 1,78                            | 1,78        | 0,83             | 7,85E-15  | 6,39E-12  |                    |
| 79937     | CNTNAP3      | 2160,13   | 1486,05                          | 0,69                            | 0,69        | -0,54            | 1,36E-14  | 1,06E-11  |                    |
| 10964     | IFI44L       | 1567,98   | 2457,47                          | 1,57                            | 1,57        | 0,65             | 2,57E-14  | 1,93E-11  |                    |
| 3429      | IFI27        | 136,60    | 48,26                            | 0,35                            | 0,35        | -1,50            | 2,27E-13  | 1,64E-10  |                    |
| 54094     | C21orf15     | 162,16    | 268,61                           | 1,66                            | 1,66        | 0,73             | 7,78E-13  | 5,42E-10  |                    |
| 260429    | PRSS33       | 582,28    | 783,97                           | 1,35                            | 1,35        | 0,43             | 1,30E-12  | 8,74E-10  |                    |
| 115361    | GBP4         | 4483,67   | 6817,04                          | 1,52                            | 1,52        | 0,60             | 5,33E-12  | 3,47E-09  |                    |
| 146439    | CCDC64B      | 281,32    | 169,26                           | 0,60                            | 0,60        | -0,73            | 3,50E-11  | 2,20E-08  |                    |
| 55512     | SMPD3        | 1610,28   | 2239,14                          | 1,39                            | 1,39        | 0,48             | 5,83E-11  | 3,56E-08  |                    |
| 26807     | SNORD43      | 324,73    | 150,11                           | 0,46                            | 0,46        | -1,11            | 7,54E-11  | 4,46E-08  |                    |
| 4283      | CXCL9        | 25,20     | 55,36                            | 2,20                            | 2,20        | 1,14             | 1,40E-10  | 8,04E-08  |                    |
| 3048      | HBG2         | 3463,51   | 1928,19                          | 0,56                            | 0,56        | -0,84            | 2,82E-10  | 1,57E-07  | CHOLEST            |
| 3512      | IGJ          | 6667,05   | 4285,95                          | 0,64                            | 0,64        | -0,64            | 6,33E-10  | 3,43E-07  |                    |
| 29126     | CD274        | 547,72    | 813,34                           | 1,48                            | 1,48        | 0,57             | 8,72E-10  | 4,60E-07  |                    |
| 10720     | UGT2B11      | 522,54    | 747,06                           | 1,43                            | 1,43        | 0,52             | 9,86E-10  | 5,07E-07  |                    |
| 5990      | RFX2         | 1532,49   | 1109,99                          | 0,72                            | 0,72        | -0,47            | 1,10E-09  | 5,49E-07  |                    |
| 387755    | INSC         | 121,87    | 68,55                            | 0,56                            | 0,56        | -0,83            | 1,44E-09  | 6,85E-07  |                    |

|                          |          |          |      |      |       |          |          |              |
|--------------------------|----------|----------|------|------|-------|----------|----------|--------------|
| 3568 IL5RA               | 713,14   | 951,92   | 1,33 | 1,33 | 0,42  | 1,44E-09 | 6,85E-07 |              |
| 608 TNFRSF17             | 252,05   | 144,79   | 0,57 | 0,57 | -0,80 | 2,35E-09 | 1,09E-06 |              |
| 7225 TRPC6               | 45,37    | 84,12    | 1,85 | 1,85 | 0,89  | 6,06E-09 | 2,75E-06 |              |
| 59283 CACNG8             | 188,19   | 260,43   | 1,38 | 1,38 | 0,47  | 6,44E-09 | 2,86E-06 |              |
| 27087 B3GAT1             | 591,48   | 874,00   | 1,48 | 1,48 | 0,56  | 9,23E-09 | 3,93E-06 |              |
| 51673 TPPP3              | 355,79   | 247,39   | 0,70 | 0,70 | -0,52 | 9,26E-09 | 3,93E-06 |              |
| 3823 KLRC3               | 638,74   | 935,21   | 1,46 | 1,46 | 0,55  | 1,04E-08 | 4,33E-06 |              |
| 467 ATF3                 | 60,78    | 105,53   | 1,74 | 1,74 | 0,80  | 1,86E-08 | 7,55E-06 | CHOLEST      |
| 51237 MZB1               | 934,69   | 603,45   | 0,65 | 0,65 | -0,63 | 2,66E-08 | 1,06E-05 |              |
| 10561 IFI44              | 2736,70  | 3780,68  | 1,38 | 1,38 | 0,47  | 2,77E-08 | 1,08E-05 |              |
| 249 ALPL                 | 10622,22 | 7638,33  | 0,72 | 0,72 | -0,48 | 3,53E-08 | 1,35E-05 | CHOLEST      |
| 81567 TXNDC5             | 7668,61  | 5140,36  | 0,67 | 0,67 | -0,58 | 4,29E-08 | 1,61E-05 |              |
| 1178 CLC                 | 4252,57  | 5215,03  | 1,23 | 1,23 | 0,29  | 6,85E-08 | 2,52E-05 |              |
| 10215 OLIG2              | 125,59   | 171,07   | 1,36 | 1,36 | 0,45  | 7,43E-08 | 2,68E-05 |              |
| 340654 LIPM              | 9,33     | 25,64    | 2,75 | 2,75 | 1,46  | 1,15E-07 | 4,09E-05 |              |
| 343413 FCRL6             | 1834,08  | 2511,29  | 1,37 | 1,37 | 0,45  | 1,49E-07 | 5,20E-05 |              |
| 199675 C19orf59          | 916,79   | 634,16   | 0,69 | 0,69 | -0,53 | 1,84E-07 | 6,29E-05 |              |
| 51348 KLRF1              | 2398,33  | 3313,26  | 1,38 | 1,38 | 0,47  | 2,59E-07 | 8,70E-05 |              |
| 8302 KLRC4               | 381,39   | 524,92   | 1,38 | 1,38 | 0,46  | 2,70E-07 | 8,92E-05 |              |
| 2030 SLC29A1             | 911,04   | 1177,44  | 1,29 | 1,29 | 0,37  | 2,77E-07 | 9,00E-05 |              |
| 5159 PDGFRB              | 310,72   | 426,35   | 1,37 | 1,37 | 0,46  | 3,24E-07 | 1,04E-04 |              |
| 7453 WARS                | 9217,57  | 12071,43 | 1,31 | 1,31 | 0,39  | 3,60E-07 | 1,13E-04 |              |
| 360226 PRSS41            | 81,69    | 112,62   | 1,38 | 1,38 | 0,46  | 3,99E-07 | 1,24E-04 |              |
| 59340 HRH4               | 298,18   | 410,71   | 1,38 | 1,38 | 0,46  | 4,65E-07 | 1,42E-04 |              |
| 129607 CMPK2             | 759,54   | 1013,61  | 1,33 | 1,33 | 0,42  | 5,08E-07 | 1,52E-04 |              |
| 1281 COL3A1              | 3,36     | 10,72    | 3,19 | 3,19 | 1,68  | 5,50E-07 | 1,63E-04 | CHOLEST      |
| 2735 GLI1                | 1364,30  | 1058,90  | 0,78 | 0,78 | -0,37 | 6,76E-07 | 1,91E-04 |              |
| 1277 COL1A1              | 9,17     | 20,72    | 2,26 | 2,26 | 1,18  | 6,76E-07 | 1,91E-04 |              |
| 5414 SEPT4               | 85,21    | 138,05   | 1,62 | 1,62 | 0,70  | 6,69E-07 | 1,91E-04 |              |
| 10417 SPON2              | 4800,57  | 6149,92  | 1,28 | 1,28 | 0,36  | 6,97E-07 | 1,94E-04 |              |
| 169355 IDO2              | 32,11    | 55,53    | 1,73 | 1,73 | 0,79  | 1,17E-06 | 3,23E-04 |              |
| 4318 MMP9                | 5448,93  | 3902,03  | 0,72 | 0,72 | -0,48 | 1,26E-06 | 3,41E-04 | BMI, CHOLEST |
| 722 C4BPA                | 106,02   | 175,99   | 1,66 | 1,66 | 0,73  | 1,34E-06 | 3,59E-04 |              |
| 140 ADORA3               | 428,57   | 550,41   | 1,28 | 1,28 | 0,36  | 1,39E-06 | 3,66E-04 |              |
| 91663 MYADM              | 16747,27 | 13139,11 | 0,78 | 0,78 | -0,35 | 1,40E-06 | 3,66E-04 |              |
| 94240 EPSTI1             | 1697,82  | 2186,08  | 1,29 | 1,29 | 0,36  | 1,72E-06 | 4,43E-04 |              |
| 54658 UGT1A1             | 4,11     | 0,11     | 0,03 | 0,03 | -5,24 | 1,95E-06 | 4,93E-04 | BMI          |
| 1634 DCN                 | 2,52     | 10,17    | 4,04 | 4,04 | 2,01  | 2,08E-06 | 5,21E-04 |              |
| 125875 CLDND2            | 275,26   | 387,46   | 1,41 | 1,41 | 0,49  | 2,16E-06 | 5,33E-04 |              |
| 60675 PROK2              | 7658,56  | 5655,89  | 0,74 | 0,74 | -0,44 | 2,19E-06 | 5,33E-04 |              |
| 10316 NMUR1              | 897,47   | 1192,55  | 1,33 | 1,33 | 0,41  | 2,22E-06 | 5,34E-04 |              |
| 100128770 RP11-473M20.5  | 501,30   | 366,43   | 0,73 | 0,73 | -0,45 | 2,41E-06 | 5,73E-04 |              |
| 100526836 BLOC1S5-TXNDC5 | 8670,39  | 6147,47  | 0,71 | 0,71 | -0,50 | 2,44E-06 | 5,74E-04 |              |
| 10409 BASP1              | 11301,95 | 8292,44  | 0,73 | 0,73 | -0,45 | 2,58E-06 | 5,92E-04 |              |
| 2172 FABP6               | 273,58   | 194,82   | 0,71 | 0,71 | -0,49 | 2,55E-06 | 5,92E-04 |              |
| 9050 PSTPIP2             | 3461,51  | 4383,66  | 1,27 | 1,27 | 0,34  | 2,71E-06 | 6,14E-04 |              |
| 8671 SLC4A4              | 135,90   | 204,17   | 1,50 | 1,50 | 0,59  | 2,74E-06 | 6,14E-04 |              |
| 100131561 FKSG29         | 58,43    | 81,27    | 1,39 | 1,39 | 0,48  | 2,92E-06 | 6,33E-04 |              |
| 6772 STAT1               | 13774,49 | 18083,31 | 1,31 | 1,31 | 0,39  | 2,91E-06 | 6,33E-04 |              |
| 54625 PARP14             | 14102,75 | 19031,89 | 1,35 | 1,35 | 0,43  | 2,91E-06 | 6,33E-04 |              |
| 134549 SHROOM1           | 519,81   | 398,98   | 0,77 | 0,77 | -0,38 | 3,04E-06 | 6,53E-04 |              |
| 11251 PTGDR2             | 921,31   | 1129,48  | 1,23 | 1,23 | 0,29  | 3,10E-06 | 6,58E-04 |              |
| 3816 KLK1                | 45,58    | 26,82    | 0,59 | 0,59 | -0,77 | 3,22E-06 | 6,76E-04 |              |
| 3488 IGFBP5              | 18,44    | 5,60     | 0,30 | 0,30 | -1,72 | 4,65E-06 | 9,66E-04 |              |
| 1844 DUSP2               | 765,67   | 1150,97  | 1,50 | 1,50 | 0,59  | 5,03E-06 | 1,03E-03 |              |
| 653061 GOLGA8S           | 43,05    | 80,28    | 1,86 | 1,86 | 0,90  | 5,30E-06 | 1,08E-03 |              |
| 283177 LOC283177         | 85,10    | 120,25   | 1,41 | 1,41 | 0,50  | 5,36E-06 | 1,08E-03 |              |
| 338596 ST8SIA6           | 183,11   | 270,38   | 1,48 | 1,48 | 0,56  | 5,84E-06 | 1,15E-03 |              |
| 4603 MYBL1               | 2843,69  | 3861,03  | 1,36 | 1,36 | 0,44  | 5,82E-06 | 1,15E-03 |              |
| 9289 GPR56               | 6078,02  | 7843,57  | 1,29 | 1,29 | 0,37  | 6,12E-06 | 1,19E-03 |              |
| 219537 SMTNL1            | 232,81   | 343,83   | 1,48 | 1,48 | 0,56  | 6,20E-06 | 1,20E-03 |              |
| 4940 OAS3                | 4578,37  | 5898,12  | 1,29 | 1,29 | 0,37  | 7,55E-06 | 1,45E-03 |              |
| 3824 KLRD1               | 2610,06  | 3505,34  | 1,34 | 1,34 | 0,43  | 7,82E-06 | 1,48E-03 |              |

|           |            |          |          |      |      |       |          |          |              |
|-----------|------------|----------|----------|------|------|-------|----------|----------|--------------|
| 3802      | KIR2DL1    | 184,43   | 251,33   | 1,36 | 1,36 | 0,45  | 9,38E-06 | 1,76E-03 |              |
| 285696    | AC091878.1 | 185,84   | 134,77   | 0,73 | 0,73 | -0,46 | 9,79E-06 | 1,82E-03 |              |
| 139189    | DGKK       | 115,31   | 161,79   | 1,40 | 1,40 | 0,49  | 1,01E-05 | 1,87E-03 |              |
| 3240      | HP         | 273,03   | 178,99   | 0,66 | 0,66 | -0,61 | 1,04E-05 | 1,90E-03 | CHOLEST      |
| 3763      | KCNJ6      | 786,34   | 611,49   | 0,78 | 0,78 | -0,36 | 1,14E-05 | 2,06E-03 |              |
| 54659     | UGT1A3     | 4,17     | 0,19     | 0,05 | 0,05 | -4,47 | 1,34E-05 | 2,40E-03 |              |
| 1071      | CETP       | 320,14   | 427,73   | 1,34 | 1,34 | 0,42  | 1,44E-05 | 2,56E-03 | BMI, CHOLEST |
| 125336    | LOXHD1     | 460,90   | 366,39   | 0,79 | 0,79 | -0,33 | 1,98E-05 | 3,48E-03 |              |
| 80310     | PDGFD      | 357,45   | 500,68   | 1,40 | 1,40 | 0,49  | 2,29E-05 | 3,95E-03 |              |
| 1593      | CYP27A1    | 2815,79  | 2182,03  | 0,77 | 0,77 | -0,37 | 2,28E-05 | 3,95E-03 | CHOLEST      |
| 54575     | UGT1A10    | 6,61     | 0,99     | 0,15 | 0,15 | -2,75 | 2,32E-05 | 3,98E-03 |              |
| 54600     | UGT1A9     | 6,59     | 0,99     | 0,15 | 0,15 | -2,74 | 2,52E-05 | 4,27E-03 |              |
| 54490     | UGT2B28    | 38,05    | 55,61    | 1,46 | 1,46 | 0,55  | 2,54E-05 | 4,28E-03 |              |
| 65061     | CDK15      | 22,58    | 38,52    | 1,71 | 1,71 | 0,77  | 2,90E-05 | 4,84E-03 |              |
| 101929452 | AC019048.1 | 193,76   | 254,69   | 1,31 | 1,31 | 0,39  | 3,00E-05 | 4,96E-03 |              |
| 59352     | LGR6       | 518,12   | 658,59   | 1,27 | 1,27 | 0,35  | 3,13E-05 | 5,13E-03 |              |
| 54576     | UGT1A8     | 6,78     | 1,10     | 0,16 | 0,16 | -2,62 | 3,25E-05 | 5,20E-03 |              |
| 1232      | CCR3       | 2642,45  | 3129,99  | 1,18 | 1,18 | 0,24  | 3,24E-05 | 5,20E-03 |              |
| 441168    | FAM26F     | 721,90   | 875,14   | 1,21 | 1,21 | 0,28  | 3,20E-05 | 5,20E-03 |              |
| 5996      | RGS1       | 119,71   | 181,85   | 1,52 | 1,52 | 0,60  | 3,32E-05 | 5,22E-03 |              |
| 146857    | SLFN13     | 1692,52  | 2153,12  | 1,27 | 1,27 | 0,35  | 3,34E-05 | 5,22E-03 |              |
| 3809      | KIR2DS4    | 235,84   | 319,89   | 1,36 | 1,36 | 0,44  | 3,33E-05 | 5,22E-03 |              |
| 771       | CA12       | 19,95    | 8,54     | 0,43 | 0,43 | -1,22 | 3,63E-05 | 5,62E-03 |              |
| 146433    | IL34       | 43,34    | 61,06    | 1,41 | 1,41 | 0,49  | 3,74E-05 | 5,74E-03 |              |
| 2999      | GZMH       | 2585,30  | 3261,42  | 1,26 | 1,26 | 0,34  | 3,89E-05 | 5,93E-03 |              |
| 2209      | FCGR1A     | 706,23   | 890,36   | 1,26 | 1,26 | 0,33  | 4,00E-05 | 6,05E-03 |              |
| 762       | CA4        | 588,48   | 436,96   | 0,74 | 0,74 | -0,43 | 4,16E-05 | 6,25E-03 |              |
| 11326     | VSIG4      | 224,12   | 167,31   | 0,75 | 0,75 | -0,42 | 4,24E-05 | 6,32E-03 |              |
| 55301     | OLAH       | 35,13    | 17,81    | 0,51 | 0,51 | -0,98 | 4,29E-05 | 6,35E-03 |              |
| 401258    | RAB44      | 962,70   | 1208,26  | 1,26 | 1,26 | 0,33  | 4,36E-05 | 6,39E-03 |              |
| 57669     | EPB41L5    | 365,79   | 471,82   | 1,29 | 1,29 | 0,37  | 4,46E-05 | 6,46E-03 |              |
| 131540    | ZDHC19     | 127,09   | 176,31   | 1,39 | 1,39 | 0,47  | 4,50E-05 | 6,46E-03 |              |
| 5166      | PDK4       | 2026,38  | 1573,24  | 0,78 | 0,78 | -0,37 | 4,47E-05 | 6,46E-03 |              |
| 10578     | GNLY       | 18321,50 | 22550,63 | 1,23 | 1,23 | 0,30  | 5,18E-05 | 7,32E-03 |              |
| 1903      | S1PR3      | 841,04   | 628,51   | 0,75 | 0,75 | -0,42 | 5,15E-05 | 7,32E-03 |              |
| 133396    | IL31RA     | 75,42    | 116,30   | 1,54 | 1,54 | 0,62  | 5,29E-05 | 7,43E-03 |              |
| 11098     | PRSS23     | 683,00   | 878,96   | 1,29 | 1,29 | 0,36  | 5,47E-05 | 7,63E-03 |              |
| 3913      | LAMB2      | 266,87   | 201,98   | 0,76 | 0,76 | -0,40 | 5,67E-05 | 7,85E-03 |              |
| 3822      | KLRC2      | 217,15   | 285,26   | 1,31 | 1,31 | 0,39  | 5,93E-05 | 8,10E-03 |              |
| 54682     | MANSC1     | 2036,09  | 1537,89  | 0,76 | 0,76 | -0,40 | 5,90E-05 | 8,10E-03 |              |
| 9173      | IL1RL1     | 182,62   | 237,19   | 1,30 | 1,30 | 0,38  | 5,98E-05 | 8,11E-03 |              |
| 9495      | AKAP5      | 237,64   | 329,15   | 1,39 | 1,39 | 0,47  | 6,04E-05 | 8,13E-03 |              |
| 54577     | UGT1A7     | 6,22     | 0,99     | 0,16 | 0,16 | -2,66 | 6,24E-05 | 8,29E-03 |              |
| 54578     | UGT1A6     | 6,22     | 0,99     | 0,16 | 0,16 | -2,66 | 6,24E-05 | 8,29E-03 |              |
| 2731      | GLDC       | 84,20    | 52,62    | 0,62 | 0,62 | -0,68 | 6,34E-05 | 8,37E-03 |              |
| 56603     | CYP26B1    | 90,90    | 69,50    | 0,76 | 0,76 | -0,39 | 6,62E-05 | 8,67E-03 |              |
| 266727    | MDGA1      | 498,11   | 536,16   | 1,08 | 1,08 | 0,11  | 6,74E-05 | 8,73E-03 |              |
| 9536      | PTGES      | 37,01    | 20,84    | 0,56 | 0,56 | -0,83 | 6,75E-05 | 8,73E-03 |              |
| 84913     | ATOH8      | 137,87   | 105,90   | 0,77 | 0,77 | -0,38 | 7,19E-05 | 9,23E-03 |              |
| 10562     | OLFM4      | 365,64   | 448,03   | 1,23 | 1,23 | 0,29  | 7,51E-05 | 9,58E-03 |              |
| 54739     | XAF1       | 5450,26  | 6805,13  | 1,25 | 1,25 | 0,32  | 7,58E-05 | 9,60E-03 |              |
| 80830     | APOL6      | 8212,36  | 10468,38 | 1,27 | 1,27 | 0,35  | 7,91E-05 | 9,95E-03 |              |
| 8277      | TKTL1      | 303,31   | 353,60   | 1,17 | 1,17 | 0,22  | 7,95E-05 | 9,95E-03 |              |

#### Headers of the Table

| geneID                      | Gene Identification                                                    |
|-----------------------------|------------------------------------------------------------------------|
| Gene Symbol                 | Official Symbol                                                        |
| Base Mean                   | Mean normalized counts, averaged over all samples from both conditions |
| Base Mean Before Medication | Mean normalized counts from condition A                                |



Base Mean  
 After Medication Mean normalized counts from condition B  
 Fold Change Fold change from condition A to B (B/A)  
 Log2 Fold Change The logarithm, to basis 2, of the fold change  
 Pval P value for the statistical significance of this change  
 Padj P value adjusted for multiple testing with the Benjamini-Hochberg procedure, which controls false discovery rate  
 GeneRif Annotation Genes including the strings “BMI” or “cholest” in their GeneRIF definition

**Supplementary Table S4. Differential expression genes between the weight and the no weight gain groups after medication**

| geneID    | Gene Symbol | Base Mean | Base Mean Weight Gain | Base Mean No Weight Gain | Fold Change | Log2 Fold Change | Pval     | Padj     | GeneRif Annotation |
|-----------|-------------|-----------|-----------------------|--------------------------|-------------|------------------|----------|----------|--------------------|
| 3047      | HBG1        | 384,26    | 145,94                | 622,58                   | 4,27        | 2,09             | 7,28E-78 | 1,42E-73 | CHOLEST            |
| 100462981 | MTRNR2L2    | 744,06    | 486,77                | 1001,34                  | 2,06        | 1,04             | 3,81E-51 | 3,70E-47 |                    |
| 23532     | PRAME       | 15,68     | 29,23                 | 2,13                     | 0,07        | -3,78            | 1,99E-29 | 1,29E-25 |                    |
| 4317      | MMP8        | 489,78    | 683,11                | 296,46                   | 0,43        | -1,20            | 1,04E-27 | 5,05E-24 | CHOLEST            |
| 93979     | CPA5        | 42,91     | 69,68                 | 16,13                    | 0,23        | -2,11            | 1,47E-26 | 5,73E-23 |                    |
| 51513     | ETV7        | 269,73    | 167,26                | 372,19                   | 2,23        | 1,15             | 2,05E-26 | 6,64E-23 |                    |
| 118932    | ANKRD22     | 293,26    | 191,43                | 395,08                   | 2,06        | 1,05             | 2,34E-24 | 6,50E-21 |                    |
| 1278      | COL1A2      | 9,76      | 1,18                  | 18,34                    | 15,60       | 3,96             | 5,33E-24 | 1,30E-20 |                    |
| 3127      | HLA-DRB5    | 3798,38   | 2909,02               | 4687,75                  | 1,61        | 0,69             | 1,28E-20 | 2,76E-17 |                    |
| 27087     | B3GAT1      | 602,07    | 413,24                | 790,90                   | 1,91        | 0,94             | 2,34E-20 | 4,55E-17 |                    |
| 26807     | SNORD43     | 272,99    | 410,01                | 135,97                   | 0,33        | -1,59            | 3,15E-20 | 5,57E-17 |                    |
| 3848      | KRT1        | 362,10    | 241,88                | 482,32                   | 1,99        | 1,00             | 1,27E-19 | 2,06E-16 |                    |
| 10232     | MSLN        | 60,01     | 83,02                 | 37,01                    | 0,45        | -1,17            | 1,98E-19 | 2,96E-16 | CHOLEST            |
| 3627      | CXCL10      | 137,02    | 85,36                 | 188,69                   | 2,21        | 1,14             | 2,81E-19 | 3,90E-16 |                    |
| 1088      | CEACAM8     | 583,42    | 777,45                | 389,40                   | 0,50        | -1,00            | 4,54E-19 | 5,88E-16 |                    |
| 671       | BPI         | 954,54    | 1253,93               | 655,15                   | 0,52        | -0,94            | 1,37E-18 | 1,66E-15 |                    |
| 3002      | GZMB        | 2759,21   | 1987,61               | 3530,81                  | 1,78        | 0,83             | 2,31E-18 | 2,64E-15 |                    |
| 419       | ART3        | 148,25    | 94,80                 | 201,71                   | 2,13        | 1,09             | 3,94E-18 | 4,25E-15 |                    |
| 10529     | NEBL        | 146,58    | 91,30                 | 201,85                   | 2,21        | 1,14             | 4,16E-18 | 4,26E-15 |                    |
| 54094     | C21orf15    | 381,10    | 519,20                | 243,00                   | 0,47        | -1,10            | 5,81E-18 | 5,65E-15 |                    |
| 80832     | APOL4       | 84,32     | 51,76                 | 116,88                   | 2,26        | 1,18             | 1,05E-17 | 9,73E-15 |                    |
| 154664    | ABCA13      | 292,58    | 392,10                | 193,06                   | 0,49        | -1,02            | 1,49E-17 | 1,32E-14 |                    |
| 3934      | LCN2        | 1045,17   | 1358,09               | 732,25                   | 0,54        | -0,89            | 1,74E-17 | 1,47E-14 | BMI                |
| 115362    | GBP5        | 14422,47  | 10811,62              | 18033,31                 | 1,67        | 0,74             | 2,14E-17 | 1,74E-14 |                    |
| 6557      | SLC12A1     | 3200,27   | 2144,40               | 4256,14                  | 1,98        | 0,99             | 2,64E-17 | 1,97E-14 |                    |
| 10501     | SEMA6B      | 110,83    | 69,85                 | 151,81                   | 2,17        | 1,12             | 2,55E-17 | 1,97E-14 |                    |
| 4057      | LTF         | 3796,89   | 4921,84               | 2671,95                  | 0,54        | -0,88            | 3,36E-17 | 2,42E-14 |                    |
| 820       | CAMP        | 600,61    | 782,59                | 418,63                   | 0,53        | -0,90            | 5,49E-17 | 3,77E-14 |                    |
| 3119      | HLA-DQB1    | 4843,38   | 3691,65               | 5995,10                  | 1,62        | 0,70             | 5,62E-17 | 3,77E-14 | CHOLEST            |
| 64478     | CSMD1       | 50,11     | 70,46                 | 29,77                    | 0,42        | -1,24            | 2,21E-16 | 1,43E-13 |                    |
| 2900      | GRIK4       | 71,31     | 41,51                 | 101,10                   | 2,44        | 1,28             | 2,50E-16 | 1,57E-13 |                    |
| 4353      | MPO         | 902,54    | 1170,11               | 634,97                   | 0,54        | -0,88            | 5,49E-16 | 3,34E-13 | BMI, CHOLEST       |
| 1669      | DEFA4       | 453,05    | 589,98                | 316,12                   | 0,54        | -0,90            | 1,30E-15 | 7,65E-13 |                    |
| 23026     | MYO16       | 294,19    | 379,24                | 209,15                   | 0,55        | -0,86            | 3,24E-15 | 1,85E-12 |                    |
| 1281      | COL3A1      | 5,09      | 0,51                  | 9,68                     | 18,86       | 4,24             | 1,27E-14 | 7,06E-12 | CHOLEST            |
| 10321     | CRISP3      | 274,44    | 360,34                | 188,54                   | 0,52        | -0,93            | 1,50E-14 | 8,13E-12 |                    |
| 3811      | KIR3DL1     | 269,06    | 199,04                | 339,08                   | 1,70        | 0,77             | 3,03E-14 | 1,59E-11 |                    |
| 116071    | BATF2       | 305,99    | 227,10                | 384,87                   | 1,69        | 0,76             | 4,00E-14 | 2,05E-11 |                    |
| 165530    | CLEC4F      | 124,58    | 83,57                 | 165,59                   | 1,98        | 0,99             | 7,44E-14 | 3,71E-11 |                    |
| 566       | AZU1        | 301,64    | 394,18                | 209,10                   | 0,53        | -0,91            | 9,46E-14 | 4,57E-11 |                    |
| 1991      | ELANE       | 243,54    | 320,98                | 166,10                   | 0,52        | -0,95            | 9,63E-14 | 4,57E-11 |                    |
| 3804      | KIR2DL3     | 161,19    | 111,53                | 210,86                   | 1,89        | 0,92             | 1,22E-13 | 5,66E-11 |                    |
| 284581    | LOC284581   | 180,20    | 230,18                | 130,21                   | 0,57        | -0,82            | 2,12E-13 | 9,59E-11 |                    |
| 1719      | DHFR        | 1383,23   | 1131,85               | 1634,60                  | 1,44        | 0,53             | 9,85E-13 | 4,36E-10 |                    |

|                         |          |          |          |       |       |          |          |              |
|-------------------------|----------|----------|----------|-------|-------|----------|----------|--------------|
| 4973 OLR1               | 89,24    | 120,90   | 57,58    | 0,48  | -1,07 | 1,13E-12 | 4,88E-10 | CHOLEST      |
| 1667 DEFA1              | 2160,26  | 2759,97  | 1560,56  | 0,57  | -0,82 | 1,23E-12 | 4,99E-10 | CHOLEST      |
| 728358 DEFA1B           | 2160,26  | 2759,97  | 1560,56  | 0,57  | -0,82 | 1,23E-12 | 4,99E-10 |              |
| 1668 DEFA3              | 2160,26  | 2759,97  | 1560,56  | 0,57  | -0,82 | 1,23E-12 | 4,99E-10 | CHOLEST      |
| 338785 KRT79            | 8,20     | 1,76     | 14,65    | 8,31  | 3,06  | 1,41E-12 | 5,58E-10 |              |
| 8277 TKTL1              | 264,63   | 209,48   | 319,78   | 1,53  | 0,61  | 1,54E-12 | 6,00E-10 |              |
| 5159 PDGFRB             | 307,12   | 228,51   | 385,74   | 1,69  | 0,76  | 1,62E-12 | 6,18E-10 |              |
| 710 SERPING1            | 816,61   | 632,34   | 1000,89  | 1,58  | 0,66  | 1,86E-12 | 6,97E-10 |              |
| 5266 PI3                | 940,57   | 1174,68  | 706,46   | 0,60  | -0,73 | 1,97E-12 | 7,23E-10 |              |
| 3809 KIR2DS4            | 238,22   | 186,96   | 289,47   | 1,55  | 0,63  | 2,36E-12 | 8,51E-10 |              |
| 389396 GLYATL3          | 4,50     | 0,21     | 8,78     | 41,57 | 5,38  | 3,41E-12 | 1,21E-09 |              |
| 5819 PVRL2              | 349,69   | 296,38   | 402,99   | 1,36  | 0,44  | 7,63E-12 | 2,65E-09 | CHOLEST      |
| 93010 B3GNT7            | 145,42   | 105,23   | 185,62   | 1,76  | 0,82  | 1,27E-11 | 4,34E-09 |              |
| 9289 GPR56              | 5845,55  | 4594,16  | 7096,95  | 1,54  | 0,63  | 1,34E-11 | 4,48E-09 |              |
| 2999 GZMH               | 2449,28  | 1947,68  | 2950,88  | 1,52  | 0,60  | 1,94E-11 | 6,40E-09 |              |
| 59352 LGR6              | 479,22   | 362,59   | 595,85   | 1,64  | 0,72  | 2,57E-11 | 8,34E-09 |              |
| 4318 MMP9               | 4561,06  | 5592,53  | 3529,59  | 0,63  | -0,66 | 2,67E-11 | 8,50E-09 | BMI, CHOLEST |
| 100463486 MTRNR2L8      | 186,52   | 145,67   | 227,38   | 1,56  | 0,64  | 3,28E-11 | 1,03E-08 |              |
| 212 ALAS2               | 5232,68  | 4227,75  | 6237,61  | 1,48  | 0,56  | 3,89E-11 | 1,20E-08 |              |
| 10398 MYL9              | 725,18   | 869,53   | 580,84   | 0,67  | -0,58 | 3,99E-11 | 1,21E-08 |              |
| 55007 FAM118A           | 2175,23  | 2611,56  | 1738,91  | 0,67  | -0,59 | 4,25E-11 | 1,27E-08 |              |
| 105 ADARB2              | 815,25   | 993,62   | 636,88   | 0,64  | -0,64 | 5,09E-11 | 1,48E-08 |              |
| 4680 CEACAM6            | 449,85   | 566,55   | 333,14   | 0,59  | -0,77 | 5,09E-11 | 1,48E-08 |              |
| 101059918 GOLGA8R       | 56,80    | 76,22    | 37,38    | 0,49  | -1,03 | 6,21E-11 | 1,78E-08 |              |
| 5473 PPBP               | 3174,53  | 3790,92  | 2558,13  | 0,67  | -0,57 | 6,46E-11 | 1,82E-08 |              |
| 9828 ARHGEF17           | 105,60   | 134,75   | 76,44    | 0,57  | -0,82 | 1,43E-10 | 3,97E-08 |              |
| 1240 CMKLR1             | 1409,52  | 1127,24  | 1691,80  | 1,50  | 0,59  | 1,78E-10 | 4,87E-08 |              |
| 9047 SH2D2A             | 1505,31  | 1199,95  | 1810,67  | 1,51  | 0,59  | 2,47E-10 | 6,68E-08 |              |
| 2633 GBP1               | 5081,66  | 4129,63  | 6033,68  | 1,46  | 0,55  | 2,99E-10 | 7,95E-08 |              |
| 467 ATF3                | 73,88    | 52,41    | 95,36    | 1,82  | 0,86  | 4,57E-10 | 1,20E-07 | CHOLEST      |
| 1690 COCH               | 208,40   | 160,42   | 256,38   | 1,60  | 0,68  | 5,20E-10 | 1,35E-07 |              |
| 91977 MYOZ3             | 11,86    | 18,86    | 4,86     | 0,26  | -1,96 | 6,23E-10 | 1,59E-07 |              |
| 6037 RNASE3             | 213,96   | 275,55   | 152,36   | 0,55  | -0,85 | 7,08E-10 | 1,79E-07 | BMI          |
| 55966 AJAP1             | 203,48   | 250,73   | 156,23   | 0,62  | -0,68 | 7,35E-10 | 1,83E-07 |              |
| 5551 PRF1               | 17240,36 | 14073,54 | 20407,18 | 1,45  | 0,54  | 7,45E-10 | 1,83E-07 |              |
| 1511 CTSG               | 144,86   | 186,38   | 103,34   | 0,55  | -0,85 | 7,75E-10 | 1,88E-07 |              |
| 3240 HP                 | 217,19   | 272,47   | 161,91   | 0,59  | -0,75 | 9,82E-10 | 2,36E-07 | CHOLEST      |
| 383 ARG1                | 473,00   | 572,53   | 373,47   | 0,65  | -0,62 | 1,02E-09 | 2,43E-07 |              |
| 1844 DUSP2              | 884,12   | 726,53   | 1041,72  | 1,43  | 0,52  | 1,34E-09 | 3,15E-07 |              |
| 5657 PRTN3              | 81,50    | 108,36   | 54,63    | 0,50  | -0,99 | 1,64E-09 | 3,79E-07 |              |
| 101927586 RP11-290F20.2 | 662,21   | 803,90   | 520,52   | 0,65  | -0,63 | 1,94E-09 | 4,44E-07 |              |
| 654341 TBC1D3G          | 2,88     | 0,18     | 5,58     | 31,55 | 4,98  | 2,32E-09 | 5,24E-07 |              |
| 11098 PRSS23            | 661,12   | 526,99   | 795,25   | 1,51  | 0,59  | 2,49E-09 | 5,56E-07 |              |
| 3812 KIR3DL2            | 207,87   | 164,49   | 251,25   | 1,53  | 0,61  | 3,21E-09 | 7,09E-07 |              |
| 6861 SYT5               | 3,36     | 0,34     | 6,39     | 18,89 | 4,24  | 3,36E-09 | 7,33E-07 |              |
| 399697 CTXN2            | 65,76    | 42,01    | 89,51    | 2,13  | 1,09  | 4,10E-09 | 8,86E-07 |              |
| 6320 CLEC11A            | 145,07   | 180,14   | 109,99   | 0,61  | -0,71 | 4,28E-09 | 9,14E-07 |              |
| 7453 WARS               | 9293,85  | 7675,18  | 10912,52 | 1,42  | 0,51  | 4,46E-09 | 9,44E-07 |              |
| 6351 CCL4               | 697,93   | 562,77   | 833,08   | 1,48  | 0,57  | 8,67E-09 | 1,81E-06 | CHOLEST      |
| 100506071 RP11-829H16.3 | 166,92   | 130,00   | 203,83   | 1,57  | 0,65  | 9,49E-09 | 1,96E-06 |              |
| 10316 NMUR1             | 904,41   | 729,78   | 1079,03  | 1,48  | 0,56  | 1,03E-08 | 2,11E-06 |              |
| 152789 JAKMIP1          | 394,65   | 326,37   | 462,93   | 1,42  | 0,50  | 1,05E-08 | 2,12E-06 |              |
| 2078 ERG                | 76,12    | 98,56    | 53,68    | 0,54  | -0,88 | 1,11E-08 | 2,23E-06 | BMI, CHOLEST |
| 5273 SERPINB10          | 60,12    | 77,32    | 42,91    | 0,56  | -0,85 | 1,29E-08 | 2,51E-06 |              |
| 3486 IGFBP3             | 205,73   | 162,61   | 248,85   | 1,53  | 0,61  | 1,28E-08 | 2,51E-06 | BMI, CHOLEST |
| 136227 COL26A1          | 64,01    | 48,93    | 79,09    | 1,62  | 0,69  | 1,29E-08 | 2,51E-06 |              |
| 284751 RP11-290F20.1    | 1440,14  | 1721,19  | 1159,10  | 0,67  | -0,57 | 1,37E-08 | 2,63E-06 |              |
| 1118 CHIT1              | 122,37   | 153,32   | 91,42    | 0,60  | -0,75 | 1,69E-08 | 3,22E-06 |              |
| 3690 ITGB3              | 1943,01  | 2302,91  | 1583,11  | 0,69  | -0,54 | 1,72E-08 | 3,24E-06 | CHOLEST      |
| 343413 FCRL6            | 1920,67  | 1569,09  | 2272,25  | 1,45  | 0,53  | 1,88E-08 | 3,51E-06 |              |
| 26011 TENM4             | 51,02    | 37,10    | 64,94    | 1,75  | 0,81  | 2,05E-08 | 3,81E-06 |              |
| 100996671 RP11-407A16.3 | 19,66    | 10,81    | 28,50    | 2,64  | 1,40  | 2,41E-08 | 4,42E-06 |              |
| 114132 SIGLEC11         | 61,06    | 81,26    | 40,86    | 0,50  | -0,99 | 2,43E-08 | 4,43E-06 |              |

|                        |          |          |          |      |       |          |                       |
|------------------------|----------|----------|----------|------|-------|----------|-----------------------|
| 53637 S1PR5            | 2098,53  | 1727,70  | 2469,37  | 1,43 | 0,52  | 2,67E-08 | 4,81E-06              |
| 91181 NUP210L          | 47,64    | 63,52    | 31,76    | 0,50 | -1,00 | 3,46E-08 | 6,17E-06              |
| 6512 SLC1A7            | 95,30    | 72,41    | 118,19   | 1,63 | 0,71  | 3,68E-08 | 6,51E-06              |
| 3802 KIR2DL1           | 188,12   | 148,85   | 227,39   | 1,53 | 0,61  | 4,00E-08 | 7,01E-06              |
| 54084 TSPEAR           | 360,50   | 433,02   | 287,97   | 0,67 | -0,59 | 4,10E-08 | 7,11E-06              |
| 3823 KLRC3             | 714,63   | 583,07   | 846,18   | 1,45 | 0,54  | 4,82E-08 | 8,30E-06              |
| 100190986 LOC100190986 | 94,99    | 88,13    | 101,86   | 1,16 | 0,21  | 5,52E-08 | 9,41E-06              |
| 9495 AKAP5             | 247,10   | 196,33   | 297,87   | 1,52 | 0,60  | 5,90E-08 | 9,97E-06              |
| 9934 P2RY14            | 817,60   | 685,06   | 950,14   | 1,39 | 0,47  | 6,76E-08 | 1,13E-05              |
| 6590 SLPI              | 336,96   | 409,30   | 264,61   | 0,65 | -0,63 | 7,58E-08 | 1,26E-05              |
| 5414 SEPT4             | 101,36   | 77,94    | 124,77   | 1,60 | 0,68  | 8,34E-08 | 1,37E-05              |
| 8993 PGLYRP1           | 814,07   | 948,39   | 679,76   | 0,72 | -0,48 | 1,14E-07 | 1,86E-05              |
| 340024 SLC6A19         | 4,89     | 8,18     | 1,60     | 0,20 | -2,35 | 1,22E-07 | 1,98E-05              |
| 84680 ACCS             | 1344,47  | 1537,67  | 1151,27  | 0,75 | -0,42 | 1,33E-07 | 2,14E-05              |
| 116835 HSPA12B         | 20,81    | 12,28    | 29,35    | 2,39 | 1,26  | 1,46E-07 | 2,33E-05              |
| 9891 NUAKE1            | 43,68    | 29,25    | 58,11    | 1,99 | 0,99  | 1,54E-07 | 2,44E-05              |
| 115361 GBP4            | 5351,52  | 4540,83  | 6162,21  | 1,36 | 0,44  | 1,65E-07 | 2,59E-05              |
| 1277 COL1A1            | 12,82    | 6,94     | 18,71    | 2,70 | 1,43  | 1,73E-07 | 2,69E-05              |
| 8671 SLC4A4            | 152,82   | 120,93   | 184,72   | 1,53 | 0,61  | 2,00E-07 | 3,08E-05              |
| 1290 COL5A2            | 38,08    | 50,18    | 25,97    | 0,52 | -0,95 | 2,05E-07 | 3,15E-05              |
| 5627 PROS1             | 92,26    | 114,91   | 69,60    | 0,61 | -0,72 | 2,22E-07 | 3,38E-05              |
| 346171 ZFP57           | 61,44    | 44,96    | 77,92    | 1,73 | 0,79  | 3,11E-07 | 4,68E-05              |
| 9510 ADAMTS1           | 223,02   | 179,82   | 266,23   | 1,48 | 0,57  | 3,53E-07 | 5,28E-05              |
| 765 CA6                | 782,20   | 912,15   | 652,26   | 0,72 | -0,48 | 3,86E-07 | 5,74E-05              |
| 133396 IL31RA          | 86,26    | 67,44    | 105,08   | 1,56 | 0,64  | 4,06E-07 | 5,99E-05              |
| 80310 PDGFD            | 385,33   | 317,63   | 453,03   | 1,43 | 0,51  | 4,64E-07 | 6,79E-05              |
| 10562 OLFM4            | 499,76   | 594,33   | 405,20   | 0,68 | -0,55 | 4,98E-07 | 7,22E-05              |
| 6425 SFRP5             | 46,87    | 59,92    | 33,82    | 0,56 | -0,83 | 5,31E-07 | 7,64E-05              |
| 283726 FAM154B         | 98,60    | 69,49    | 127,71   | 1,84 | 0,88  | 5,34E-07 | 7,64E-05              |
| 342184 FMN1            | 667,88   | 536,52   | 799,25   | 1,49 | 0,58  | 5,39E-07 | 7,65E-05              |
| 9582 APOBEC3B          | 295,29   | 237,29   | 353,30   | 1,49 | 0,57  | 5,62E-07 | 7,91E-05              |
| 30009 TBX21            | 2657,54  | 2231,66  | 3083,41  | 1,38 | 0,47  | 5,78E-07 | 8,08E-05              |
| 283177 LOC283177       | 87,88    | 66,95    | 108,80   | 1,63 | 0,70  | 6,00E-07 | 8,34E-05              |
| 57126 CD177            | 166,65   | 197,33   | 135,97   | 0,69 | -0,54 | 6,19E-07 | 8,54E-05              |
| 10578 GNLY             | 17422,45 | 14441,58 | 20403,32 | 1,41 | 0,50  | 6,38E-07 | 8,74E-05              |
| 64105 CENPK            | 838,02   | 970,00   | 706,05   | 0,73 | -0,46 | 6,45E-07 | 8,77E-05              |
| 306 ANXA3              | 1310,91  | 1527,79  | 1094,02  | 0,72 | -0,48 | 6,72E-07 | 9,07E-05              |
| 4283 CXCL9             | 38,90    | 27,77    | 50,02    | 1,80 | 0,85  | 6,77E-07 | 9,08E-05              |
| 1521 CTSW              | 5214,63  | 4426,88  | 6002,38  | 1,36 | 0,44  | 7,00E-07 | 9,32E-05              |
| 23428 SLC7A8           | 199,76   | 243,03   | 156,50   | 0,64 | -0,63 | 7,14E-07 | 9,44E-05              |
| 7049 TGFB3             | 2179,48  | 1834,87  | 2524,09  | 1,38 | 0,46  | 7,45E-07 | 9,79E-05              |
| 81788 NUAKE2           | 5820,68  | 4802,26  | 6839,10  | 1,42 | 0,51  | 1,10E-06 | 1,43E-04              |
| 3048 HBG2              | 1475,79  | 1206,34  | 1745,23  | 1,45 | 0,53  | 1,14E-06 | 1,48E-04 CHOLEST      |
| 4818 NKG7              | 9266,13  | 7874,34  | 10657,93 | 1,35 | 0,44  | 1,16E-06 | 1,50E-04              |
| 2149 F2R               | 1437,31  | 1220,36  | 1654,26  | 1,36 | 0,44  | 1,25E-06 | 1,60E-04 BMI, CHOLEST |
| 654433 PAX8-AS1        | 1182,21  | 955,77   | 1408,65  | 1,47 | 0,56  | 1,34E-06 | 1,70E-04              |
| 7849 PAX8              | 1453,81  | 1179,17  | 1728,44  | 1,47 | 0,55  | 1,61E-06 | 2,03E-04              |
| 56101 PCDHGB5          | 199,59   | 159,90   | 239,28   | 1,50 | 0,58  | 1,62E-06 | 2,03E-04              |
| 3852 KRT5              | 87,30    | 65,63    | 108,97   | 1,66 | 0,73  | 1,76E-06 | 2,20E-04              |
| 9708 PCDHGA8           | 201,50   | 161,73   | 241,28   | 1,49 | 0,58  | 1,81E-06 | 2,24E-04              |
| 83888 FGFBP2           | 2415,70  | 2039,13  | 2792,28  | 1,37 | 0,45  | 2,18E-06 | 2,69E-04              |
| 3822 KLRC2             | 221,30   | 184,50   | 258,10   | 1,40 | 0,48  | 2,22E-06 | 2,72E-04              |
| 8641 PCDHGB4           | 207,03   | 166,70   | 247,36   | 1,48 | 0,57  | 2,25E-06 | 2,73E-04              |
| 728577 CNTNAP3B        | 28,67    | 19,16    | 38,18    | 1,99 | 0,99  | 2,34E-06 | 2,83E-04              |
| 152404 IGSF11          | 22,36    | 30,44    | 14,28    | 0,47 | -1,09 | 2,43E-06 | 2,92E-04              |
| 56108 PCDHGA7          | 213,06   | 172,04   | 254,08   | 1,48 | 0,56  | 2,75E-06 | 3,28E-04              |
| 5413 SEPT5             | 1225,83  | 1411,45  | 1040,21  | 0,74 | -0,44 | 2,89E-06 | 3,43E-04              |
| 23569 PADI4            | 5688,12  | 6576,01  | 4800,23  | 0,73 | -0,45 | 3,13E-06 | 3,69E-04              |
| 2201 FBN2              | 816,14   | 698,17   | 934,12   | 1,34 | 0,42  | 3,18E-06 | 3,72E-04              |
| 79838 TMC5             | 279,67   | 325,77   | 233,57   | 0,72 | -0,48 | 3,22E-06 | 3,75E-04              |
| 441168 FAM26F          | 686,74   | 582,46   | 791,01   | 1,36 | 0,44  | 3,38E-06 | 3,91E-04              |
| 51348 KLRP1            | 2586,50  | 2175,24  | 2997,76  | 1,38 | 0,46  | 3,48E-06 | 4,00E-04              |
| 56107 PCDHGA9          | 188,03   | 151,41   | 224,65   | 1,48 | 0,57  | 3,57E-06 | 4,09E-04              |

|           |          |         |         |         |       |       |          |          |         |
|-----------|----------|---------|---------|---------|-------|-------|----------|----------|---------|
| 89944     | GLB1L2   | 122,50  | 99,00   | 146,00  | 1,47  | 0,56  | 3,72E-06 | 4,23E-04 |         |
| 51208     | CLDN18   | 24,25   | 33,30   | 15,21   | 0,46  | -1,13 | 3,78E-06 | 4,27E-04 |         |
| 117157    | SH2D1B   | 1301,34 | 1096,53 | 1506,14 | 1,37  | 0,46  | 4,59E-06 | 5,16E-04 |         |
| 116173    | CMTM5    | 155,77  | 183,72  | 127,83  | 0,70  | -0,52 | 4,76E-06 | 5,28E-04 |         |
| 56111     | PCDHGA4  | 264,03  | 216,48  | 311,57  | 1,44  | 0,53  | 4,77E-06 | 5,28E-04 |         |
| 56102     | PCDHGB3  | 244,82  | 200,00  | 289,64  | 1,45  | 0,53  | 4,78E-06 | 5,28E-04 |         |
| 56110     | PCDHGA5  | 251,86  | 205,99  | 297,74  | 1,45  | 0,53  | 4,90E-06 | 5,38E-04 |         |
| 56113     | PCDHGA2  | 267,51  | 219,51  | 315,52  | 1,44  | 0,52  | 4,94E-06 | 5,40E-04 |         |
| 56112     | PCDHGA3  | 265,48  | 217,87  | 313,09  | 1,44  | 0,52  | 5,08E-06 | 5,52E-04 |         |
| 125875    | CLDND2   | 298,73  | 246,91  | 350,55  | 1,42  | 0,51  | 5,14E-06 | 5,52E-04 |         |
| 56103     | PCDHGB2  | 262,04  | 214,98  | 309,09  | 1,44  | 0,52  | 5,13E-06 | 5,52E-04 |         |
| 56104     | PCDHGB1  | 264,81  | 217,40  | 312,21  | 1,44  | 0,52  | 5,23E-06 | 5,59E-04 |         |
| 6696      | SPP1     | 52,72   | 66,31   | 39,13   | 0,59  | -0,76 | 5,65E-06 | 6,01E-04 | CHOLEST |
| 56100     | PCDHGB6  | 183,72  | 148,55  | 218,90  | 1,47  | 0,56  | 5,75E-06 | 6,08E-04 |         |
| 3821      | KLRC1    | 329,43  | 274,74  | 384,13  | 1,40  | 0,48  | 6,08E-06 | 6,39E-04 |         |
| 56109     | PCDHGA6  | 233,79  | 191,08  | 276,49  | 1,45  | 0,53  | 6,31E-06 | 6,60E-04 |         |
| 932       | MS4A3    | 581,71  | 680,28  | 483,13  | 0,71  | -0,49 | 6,51E-06 | 6,77E-04 |         |
| 5097      | PCDH1    | 115,21  | 92,19   | 138,23  | 1,50  | 0,58  | 7,12E-06 | 7,36E-04 |         |
| 3123      | HLA-DRB1 | 8296,17 | 7381,43 | 9210,91 | 1,25  | 0,32  | 7,48E-06 | 7,70E-04 | CHOLEST |
| 222389    | BEND7    | 104,23  | 125,53  | 82,92   | 0,66  | -0,60 | 7,66E-06 | 7,84E-04 |         |
| 2944      | GSTM1    | 306,29  | 359,81  | 252,78  | 0,70  | -0,51 | 8,04E-06 | 8,17E-04 | CHOLEST |
| 10699     | CORIN    | 170,15  | 140,88  | 199,42  | 1,42  | 0,50  | 8,07E-06 | 8,17E-04 |         |
| 56114     | PCDHGA1  | 271,90  | 224,46  | 319,35  | 1,42  | 0,51  | 8,47E-06 | 8,54E-04 |         |
| 6606      | SMN1     | 169,89  | 203,05  | 136,73  | 0,67  | -0,57 | 9,18E-06 | 9,15E-04 |         |
| 6607      | SMN2     | 169,89  | 203,05  | 136,73  | 0,67  | -0,57 | 9,18E-06 | 9,15E-04 |         |
| 64284     | RAB17    | 6,63    | 2,68    | 10,57   | 3,94  | 1,98  | 1,01E-05 | 1,00E-03 |         |
| 5149      | PDE6H    | 18,23   | 11,10   | 25,35   | 2,28  | 1,19  | 1,03E-05 | 1,02E-03 |         |
| 1824      | DSC2     | 1476,69 | 1720,58 | 1232,80 | 0,72  | -0,48 | 1,19E-05 | 1,17E-03 |         |
| 127435    | PODN     | 78,89   | 61,74   | 96,03   | 1,56  | 0,64  | 1,23E-05 | 1,20E-03 |         |
| 10417     | SPON2    | 4867,27 | 4170,77 | 5563,77 | 1,33  | 0,42  | 1,32E-05 | 1,28E-03 |         |
| 8218      | CLTCL1   | 478,56  | 562,15  | 394,97  | 0,70  | -0,51 | 1,44E-05 | 1,39E-03 |         |
| 5730      | PTGDS    | 779,60  | 667,82  | 891,37  | 1,33  | 0,42  | 1,44E-05 | 1,39E-03 |         |
| 79971     | WLS      | 2486,88 | 2832,27 | 2141,49 | 0,76  | -0,40 | 1,53E-05 | 1,47E-03 |         |
| 55384     | MEG3     | 76,34   | 54,62   | 98,06   | 1,80  | 0,84  | 1,60E-05 | 1,52E-03 |         |
| 66000     | TMEM108  | 134,76  | 157,73  | 111,78  | 0,71  | -0,50 | 1,62E-05 | 1,53E-03 |         |
| 23336     | SYNM     | 330,20  | 283,91  | 376,49  | 1,33  | 0,41  | 1,72E-05 | 1,62E-03 |         |
| 57595     | PDZD4    | 1576,13 | 1355,88 | 1796,37 | 1,32  | 0,41  | 1,78E-05 | 1,67E-03 |         |
| 1308      | COL17A1  | 59,39   | 74,38   | 44,40   | 0,60  | -0,74 | 1,86E-05 | 1,74E-03 |         |
| 401124    | DTHD1    | 503,22  | 430,15  | 576,28  | 1,34  | 0,42  | 1,92E-05 | 1,79E-03 |         |
| 3824      | KLRD1    | 2799,67 | 2427,52 | 3171,82 | 1,31  | 0,39  | 1,99E-05 | 1,84E-03 |         |
| 100506084 | ARL17B   | 270,15  | 222,09  | 318,20  | 1,43  | 0,52  | 2,03E-05 | 1,87E-03 |         |
| 81563     | C1orf21  | 643,50  | 554,34  | 732,67  | 1,32  | 0,40  | 2,07E-05 | 1,87E-03 |         |
| 4684      | NCAM1    | 795,37  | 689,07  | 901,67  | 1,31  | 0,39  | 2,07E-05 | 1,87E-03 |         |
| 51326     | ARL17A   | 270,26  | 222,20  | 318,31  | 1,43  | 0,52  | 2,04E-05 | 1,87E-03 |         |
| 56603     | CYP26B1  | 49,37   | 35,85   | 62,89   | 1,75  | 0,81  | 2,06E-05 | 1,87E-03 |         |
| 946       | SIGLEC6  | 138,84  | 113,81  | 163,87  | 1,44  | 0,53  | 2,18E-05 | 1,95E-03 |         |
| 3001      | GZMA     | 2817,59 | 2440,40 | 3194,78 | 1,31  | 0,39  | 2,17E-05 | 1,95E-03 |         |
| 4929      | NR4A2    | 115,76  | 96,01   | 135,51  | 1,41  | 0,50  | 2,30E-05 | 2,05E-03 |         |
| 57419     | SLC24A3  | 226,90  | 263,71  | 190,08  | 0,72  | -0,47 | 2,34E-05 | 2,08E-03 |         |
| 30848     | CTAG2    | 1,66    | 0,22    | 3,10    | 14,33 | 3,84  | 2,43E-05 | 2,15E-03 |         |
| 90011     | KIR3DX1  | 62,01   | 47,60   | 76,41   | 1,61  | 0,68  | 2,47E-05 | 2,17E-03 |         |
| 353299    | RGSL1    | 17,88   | 24,67   | 11,09   | 0,45  | -1,15 | 2,48E-05 | 2,18E-03 |         |
| 266629    | SEC14L3  | 51,90   | 64,31   | 39,50   | 0,61  | -0,70 | 2,52E-05 | 2,20E-03 |         |
| 666       | BOK      | 170,14  | 143,15  | 197,12  | 1,38  | 0,46  | 2,58E-05 | 2,24E-03 |         |
| 57823     | SLAMF7   | 3132,65 | 2743,71 | 3521,59 | 1,28  | 0,36  | 2,72E-05 | 2,31E-03 |         |
| 7052      | TGM2     | 115,00  | 97,54   | 132,46  | 1,36  | 0,44  | 2,69E-05 | 2,31E-03 |         |
| 2815      | GP9      | 263,23  | 302,38  | 224,08  | 0,74  | -0,43 | 2,69E-05 | 2,31E-03 |         |
| 27242     | TNFRSF21 | 203,85  | 169,20  | 238,50  | 1,41  | 0,50  | 2,71E-05 | 2,31E-03 |         |
| 4603      | MYBL1    | 3089,16 | 2685,09 | 3493,22 | 1,30  | 0,38  | 2,71E-05 | 2,31E-03 |         |
| 200132    | TCTEX1D1 | 29,88   | 38,07   | 21,68   | 0,57  | -0,81 | 2,82E-05 | 2,39E-03 |         |
| 3674      | ITGA2B   | 1901,65 | 2153,26 | 1650,03 | 0,77  | -0,38 | 3,04E-05 | 2,56E-03 |         |
| 4481      | MSR1     | 211,57  | 191,40  | 231,74  | 1,21  | 0,28  | 3,05E-05 | 2,56E-03 |         |
| 150165    | XKR3     | 81,17   | 102,78  | 59,56   | 0,58  | -0,79 | 3,13E-05 | 2,61E-03 |         |

|           |                  |         |         |         |      |       |          |          |         |
|-----------|------------------|---------|---------|---------|------|-------|----------|----------|---------|
| 28959     | TMEM176B         | 1742,43 | 1894,04 | 1590,82 | 0,84 | -0,25 | 3,18E-05 | 2,64E-03 |         |
| 41        | ASIC1            | 58,12   | 70,93   | 45,31   | 0,64 | -0,65 | 3,25E-05 | 2,69E-03 |         |
| 4914      | NTRK1            | 216,86  | 182,08  | 251,65  | 1,38 | 0,47  | 3,29E-05 | 2,71E-03 | BMI     |
| 2258      | FGF13            | 61,34   | 74,28   | 48,40   | 0,65 | -0,62 | 3,30E-05 | 2,71E-03 |         |
| 440823    | MIAT             | 5852,05 | 5089,94 | 6614,16 | 1,30 | 0,38  | 3,37E-05 | 2,75E-03 |         |
| 56106     | PCDHGA10         | 166,37  | 136,85  | 195,89  | 1,43 | 0,52  | 3,66E-05 | 2,98E-03 |         |
| 27239     | GPR162           | 1313,53 | 1540,89 | 1086,17 | 0,70 | -0,50 | 3,93E-05 | 3,19E-03 |         |
| 713       | C1QB             | 65,66   | 53,16   | 78,16   | 1,47 | 0,56  | 4,02E-05 | 3,24E-03 |         |
| 51148     | CERCAM           | 81,35   | 63,92   | 98,78   | 1,55 | 0,63  | 4,06E-05 | 3,27E-03 |         |
| 9231      | DLG5             | 460,65  | 388,67  | 532,63  | 1,37 | 0,45  | 4,16E-05 | 3,33E-03 |         |
| 283358    | B4GALNT3         | 213,00  | 185,43  | 240,58  | 1,30 | 0,38  | 4,41E-05 | 3,52E-03 |         |
| 23601     | CLEC5A           | 402,64  | 468,45  | 336,84  | 0,72 | -0,48 | 4,85E-05 | 3,85E-03 |         |
| 1908      | EDN3             | 16,40   | 22,79   | 10,02   | 0,44 | -1,19 | 5,15E-05 | 4,07E-03 |         |
| 1053      | CEBPE            | 349,01  | 401,07  | 296,95  | 0,74 | -0,43 | 5,35E-05 | 4,21E-03 |         |
| 9914      | ATP2C2           | 134,18  | 158,67  | 109,69  | 0,69 | -0,53 | 5,79E-05 | 4,54E-03 |         |
| 55365     | TMEM176A         | 626,05  | 679,11  | 573,00  | 0,84 | -0,25 | 5,93E-05 | 4,63E-03 |         |
| 285852    | TREML4           | 454,35  | 392,31  | 516,38  | 1,32 | 0,40  | 6,09E-05 | 4,74E-03 |         |
| 2791      | GNG11            | 802,90  | 901,24  | 704,56  | 0,78 | -0,36 | 6,12E-05 | 4,74E-03 |         |
| 1663      | DDX11            | 1069,72 | 1170,44 | 968,99  | 0,83 | -0,27 | 6,27E-05 | 4,84E-03 |         |
| 2359      | FPR3             | 194,12  | 165,43  | 222,81  | 1,35 | 0,43  | 6,55E-05 | 5,04E-03 |         |
| 8082      | SSPN             | 146,29  | 122,57  | 170,01  | 1,39 | 0,47  | 6,59E-05 | 5,05E-03 |         |
| 5196      | PF4              | 1268,74 | 1413,37 | 1124,12 | 0,80 | -0,33 | 6,67E-05 | 5,09E-03 | BMI     |
| 100534611 | TM4SF19-TCTEX1D2 | 236,64  | 200,44  | 272,84  | 1,36 | 0,44  | 6,71E-05 | 5,10E-03 |         |
| 3120      | HLA-DQB2         | 48,40   | 36,34   | 60,46   | 1,66 | 0,73  | 6,77E-05 | 5,12E-03 |         |
| 1667      | DEFA1            | 3,42    | 5,79    | 1,04    | 0,18 | -2,47 | 6,86E-05 | 5,15E-03 | CHOLEST |
| 728358    | DEFA1B           | 3,42    | 5,79    | 1,04    | 0,18 | -2,47 | 6,86E-05 | 5,15E-03 |         |
| 1634      | DCN              | 6,18    | 3,18    | 9,19    | 2,89 | 1,53  | 6,89E-05 | 5,15E-03 |         |
| 64167     | ERAP2            | 5615,76 | 4989,48 | 6242,05 | 1,25 | 0,32  | 6,95E-05 | 5,18E-03 |         |
| 6753      | SSTR3            | 365,31  | 414,79  | 315,83  | 0,76 | -0,39 | 7,20E-05 | 5,34E-03 |         |
| 116534    | MRGPRE           | 23,01   | 29,92   | 16,09   | 0,54 | -0,89 | 7,83E-05 | 5,78E-03 |         |
| 56099     | PCDHGB7          | 154,81  | 128,44  | 181,19  | 1,41 | 0,50  | 7,85E-05 | 5,78E-03 |         |
| 387509    | GPR153           | 127,70  | 106,74  | 148,66  | 1,39 | 0,48  | 7,90E-05 | 5,80E-03 |         |
| 5098      | PCDHGC3          | 132,55  | 108,98  | 156,12  | 1,43 | 0,52  | 8,06E-05 | 5,89E-03 |         |
| 89872     | AQP10            | 76,77   | 92,09   | 61,44   | 0,67 | -0,58 | 8,27E-05 | 6,02E-03 |         |
| 9398      | CD101            | 1739,15 | 1948,97 | 1529,34 | 0,78 | -0,35 | 8,39E-05 | 6,09E-03 |         |
| 94025     | MUC16            | 15,23   | 10,16   | 20,30   | 2,00 | 1,00  | 8,50E-05 | 6,14E-03 | CHOLEST |
| 26025     | PCDHGA12         | 140,52  | 116,12  | 164,92  | 1,42 | 0,51  | 8,60E-05 | 6,17E-03 |         |
| 23500     | DAAM2            | 310,78  | 265,80  | 355,75  | 1,34 | 0,42  | 8,60E-05 | 6,17E-03 |         |
| 1832      | DSP              | 172,18  | 134,73  | 209,62  | 1,56 | 0,64  | 8,95E-05 | 6,40E-03 |         |
| 116448    | OLIG1            | 974,59  | 1089,16 | 860,03  | 0,79 | -0,34 | 9,24E-05 | 6,58E-03 |         |
| 84525     | HOPX             | 970,87  | 838,02  | 1103,72 | 1,32 | 0,40  | 9,95E-05 | 7,04E-03 |         |
| 54796     | BNC2             | 128,09  | 107,54  | 148,64  | 1,38 | 0,47  | 9,95E-05 | 7,04E-03 |         |
| 9022      | CLIC3            | 489,84  | 430,05  | 549,62  | 1,28 | 0,35  | 1,01E-04 | 7,08E-03 |         |
| 3805      | KIR2DL4          | 66,52   | 54,54   | 78,49   | 1,44 | 0,53  | 1,03E-04 | 7,20E-03 |         |
| 4052      | LTBP1            | 239,13  | 277,31  | 200,94  | 0,72 | -0,46 | 1,04E-04 | 7,31E-03 |         |
| 54836     | BSPRY            | 32,34   | 23,81   | 40,87   | 1,72 | 0,78  | 1,07E-04 | 7,47E-03 |         |
| 79623     | GALNT14          | 172,67  | 196,79  | 148,55  | 0,75 | -0,41 | 1,08E-04 | 7,47E-03 |         |
| 219537    | SMTNL1           | 276,11  | 241,40  | 310,82  | 1,29 | 0,36  | 1,10E-04 | 7,58E-03 |         |
| 90102     | PHLDB2           | 384,94  | 331,81  | 438,07  | 1,32 | 0,40  | 1,10E-04 | 7,58E-03 |         |
| 152687    | ZNF595           | 392,22  | 335,18  | 449,26  | 1,34 | 0,42  | 1,15E-04 | 7,88E-03 |         |
| 554226    | ANKRD30BL        | 268,15  | 304,30  | 232,00  | 0,76 | -0,39 | 1,19E-04 | 8,12E-03 |         |
| 631       | BFSP1            | 124,73  | 103,93  | 145,54  | 1,40 | 0,49  | 1,19E-04 | 8,12E-03 |         |
| 56105     | PCDHGA11         | 149,89  | 124,77  | 175,02  | 1,40 | 0,49  | 1,21E-04 | 8,19E-03 |         |
| 10231     | RCAN2            | 31,55   | 24,61   | 38,49   | 1,56 | 0,65  | 1,21E-04 | 8,19E-03 |         |
| 8787      | RGS9             | 454,40  | 395,59  | 513,22  | 1,30 | 0,38  | 1,22E-04 | 8,22E-03 |         |
| 2946      | GSTM2            | 1211,84 | 1354,85 | 1068,83 | 0,79 | -0,34 | 1,25E-04 | 8,41E-03 |         |
| 9437      | NCR1             | 425,46  | 365,43  | 485,50  | 1,33 | 0,41  | 1,25E-04 | 8,41E-03 |         |
| 23547     | LILRA4           | 489,06  | 421,31  | 556,80  | 1,32 | 0,40  | 1,27E-04 | 8,49E-03 |         |
| 192683    | SCAMP5           | 294,54  | 251,63  | 337,46  | 1,34 | 0,42  | 1,28E-04 | 8,51E-03 |         |
| 100506159 | LOC100506159     | 103,74  | 124,83  | 82,64   | 0,66 | -0,59 | 1,33E-04 | 8,86E-03 |         |
| 55020     | TTC38            | 1678,86 | 1471,58 | 1886,14 | 1,28 | 0,36  | 1,45E-04 | 9,58E-03 |         |
| 249       | ALPL             | 7822,57 | 8734,78 | 6910,35 | 0,79 | -0,34 | 1,47E-04 | 9,69E-03 | CHOLEST |
| 126326    | GIPC3            | 223,25  | 253,15  | 193,35  | 0,76 | -0,39 | 1,48E-04 | 9,69E-03 |         |

|                |         |         |         |      |       |          |                  |
|----------------|---------|---------|---------|------|-------|----------|------------------|
| 6915 TBXA2R    | 141,25  | 164,03  | 118,47  | 0,72 | -0,47 | 1,48E-04 | 9,69E-03         |
| 60675 PROK2    | 5756,30 | 6396,31 | 5116,29 | 0,80 | -0,32 | 1,48E-04 | 9,69E-03         |
| 114884 OSBPL10 | 413,24  | 352,05  | 474,43  | 1,35 | 0,43  | 1,49E-04 | 9,72E-03 CHOLEST |
| 9254 CACNA2D2  | 793,35  | 694,79  | 891,91  | 1,28 | 0,36  | 1,53E-04 | 9,89E-03         |
| 60489 APOBEC3G | 2697,98 | 2375,05 | 3020,90 | 1,27 | 0,35  | 1,54E-04 | 9,94E-03         |

#### Headers of the Table

|                          |                                                                                                                  |
|--------------------------|------------------------------------------------------------------------------------------------------------------|
| geneID                   | Gene Identification                                                                                              |
| Gene Symbol              | Official Symbol                                                                                                  |
| Base Mean                | Mean normalized counts, averaged over all samples from both conditions                                           |
| Base Mean Weight Gain    | Mean normalized counts from condition A                                                                          |
| Base Mean No Weight Gain | Mean normalized counts from condition B                                                                          |
| Fold Change              | Fold change from condition A to B (B/A)                                                                          |
| Log2 Fold Change         | The logarithm, to basis 2, of the fold change                                                                    |
| Pval                     | P value for the statistical significance of this change                                                          |
| Padj                     | P value adjusted for multiple testing with the Benjamini-Hochberg procedure, which controls false discovery rate |
| GeneRif Annotation       | Genes including the strings "BMI" or "cholest" in their GeneRIF definition                                       |
